# Supplementary material for: Efficient Removal of Carcinogenic Azo Dyes from Water Using Iron(II) Clathrochelate Derived Metalorganic Copolymers Made from a Copper-Catalyzed [4 + 2] Cyclobenzannulation Reaction
Source: MDPI journal article supplement (doi:10.3390/polym15132948), 2023-07-04
Supplement: s1 [file s1]

# Efficient Removal of Carcinogenic Azo Dyes from Water Using Iron(II) Clathrochelate Derived Metalorganic Copolymers Made from a Copper-Catalyzed [4 + 2] Cyclobenzannulation Reaction

Noorullah Baig <sup>1,2</sup>, Suchetha Shetty <sup>1,2</sup>, Rupa Bargakshatriya <sup>3</sup>, Sumit Kumar Pramanik <sup>3</sup> and Bassam Alameddine <sup>1,2,\*</sup>

<sup>1</sup> Department of Mathematics and Natural Sciences, Gulf University for Science and Technology, Mubarak Al-Abdullah 32093, Kuwait

<sup>2</sup> Functional Materials Group, Gulf University for Science and Technology, Mubarak Al-Abdullah 32093, Kuwait

<sup>3</sup> CSIR-Central Salt and Marine Chemicals Research Institute, Gijubhai Badheka Marg, Bhavnagar 364002, Gujarat, India; sumitpramanik@csmcri.res.in (S.K.P.)

\* Correspondence: alameddine.b@gust.edu.kw; Tel.: +965-2530-7111

## Contents

|                                                                       |                |
|-----------------------------------------------------------------------|----------------|
| Chemical structures of some azo dyes                                  | Table S1       |
| Synthesis of <b>4</b>                                                 | Scheme S1      |
| <sup>1</sup> H-NMR spectra of <b>4</b> , <b>CM1-3</b> , & <b>CBM</b>  | Figure S1-S5   |
| <sup>13</sup> C-NMR spectra of <b>4</b> , <b>CM1-3</b> , & <b>CBM</b> | Figure S6-S10  |
| ESI-MS of <b>4</b> , <b>CM1,2</b> , & <b>CBM</b>                      | FigureS11-S14  |
| CHN analysis of <b>CM3</b>                                            | Table S2       |
| FT-IR of <b>CM1-3</b> , <b>CBM</b> , & <b>CBP1-3</b>                  | Figure S15-S21 |
| XPS spectra of copolymers <b>CBP1,3</b>                               | Figure S22-S23 |
| UV-VIS absorption spectra of <b>CM1-3</b> & <b>CBP2</b>               | Figure S24-S25 |
| Nitrogen isotherms of <b>CBP1-3</b>                                   | Figure 26-S28  |
| Methylene red (MR) dye adsorption by <b>CBP1-2</b>                    | Figure S29-S30 |
| Langmuir & Freundlich isotherm models of MR on <b>CBP1-3</b>          | Figure S31-S33 |
| Plausible interaction between the copolymer and MR dye                | Figure S34     |

**Table S1:** Chemical Structures of some azo dyes

| Entry | Dye            | Structure                                                                                                                                                                             |
|-------|----------------|---------------------------------------------------------------------------------------------------------------------------------------------------------------------------------------|
| 1     | Methyl orange  | 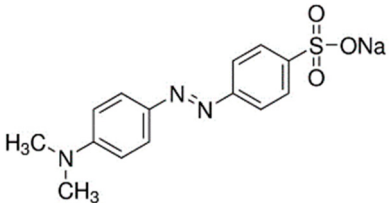<br><chem>CN(C)c1ccc(cc1)/N=N/c2ccc(cc2)S(=O)(=O)[O-].[Na+]</chem>                                  |
| 2     | Acid yellow 36 | <br><chem>[Na+].[O-]S(=O)(=O)c1ccc(cc1)/N=N/c2ccc(cc2)Nc3ccccc3</chem>                              |
| 3     | Methyl red     |                                                                                                                                                                                       |
| 4     | Acid Orange 7  | <br><chem>Oc1ccc2cc(ccc2c1)/N=N/c3ccc(cc3)S(=O)(=O)[O-].[Na+]</chem>                              |
| 5     | Acid Red 18    | <br><chem>[Na+].[O-]S(=O)(=O)c1ccc2cc(ccc2c1)/N=N/c3cc(O)ccc3c4cc(ccc4)S(=O)(=O)[O-].[Na+]</chem> |

**i). Synthesis of 4:**

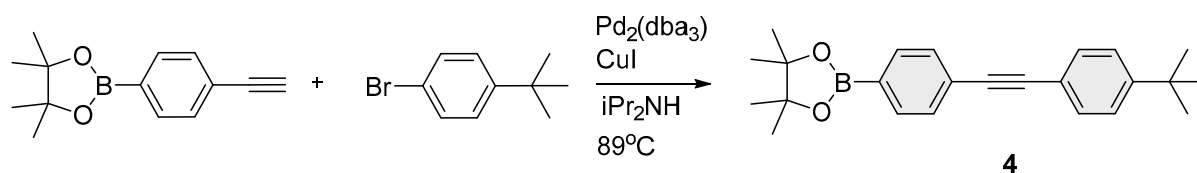

**Scheme S1:** Synthesis of **4**

A Schlenk tube was charged under argon with 4-Ethynylphenylboronic acid pinacol ester (798 mg, 3.5 mmol, 1 eq.), 1-Bromo-4-tert-butylbenzene (637 mL, 3.6 mmol, 1.05 eq.),  $\text{Pd}_2(\text{dba})_3$  (19 mg, 2.1  $\mu\text{mol}$ , 6 mol%),  $\text{PPh}_3$  (11 mg, 4.2  $\mu\text{mol}$ ), and  $\text{CuI}$  (8 mg, 4.2  $\mu\text{mol}$ ) in 8 mL of degassed diisopropylamine ( $\text{iPr}_2\text{NH}$ ) and the solution was refluxed for 2 days and the solvent was then evaporated under reduced pressure. The resulting residue was extracted with DCM from an aqueous solution of  $\text{NaHCO}_3$  and the organic layer was washed with a brine solution followed by deionized water (500 mL  $\times$  2). The desired product was isolated by silica gel column chromatography, using DCM/hexane (10:90 v/v) as the eluent. Brown solid (1.2 g, 95%).  $^1\text{H}$ -NMR (600 MHz,  $\text{CDCl}_3$ , ppm):  $\delta$  7.78 (d, 2H,  $J = 8.0$  Hz, ArH), 7.52 (d, 2H,  $J = 7.7$  Hz, ArH), 7.45 (d, 2H,  $J = 8.3$  Hz, ArH) 7.37 (d, 2H,  $J = 8.3$  Hz, ArH) 1.34 (s, 9H,  $-\text{CH}_3$ ), 1.29 (s, 12H,  $-\text{CH}_3$ ).  $^{13}\text{C}$ -NMR (150 MHz,  $\text{CDCl}_3$ , ppm):  $\delta$  151.76, 134.65, 131.47, 130.81, 127.28, 126.31, 125.44, 120.22, 90.99, 89.01, 84.01, 34.88, 31.25, 34.96. ESI-MS:  $m/z$  calculated for  $\text{M}+1$   $\text{C}_{24}\text{H}_{30}\text{BO}_2$  361.23 found 361.21.

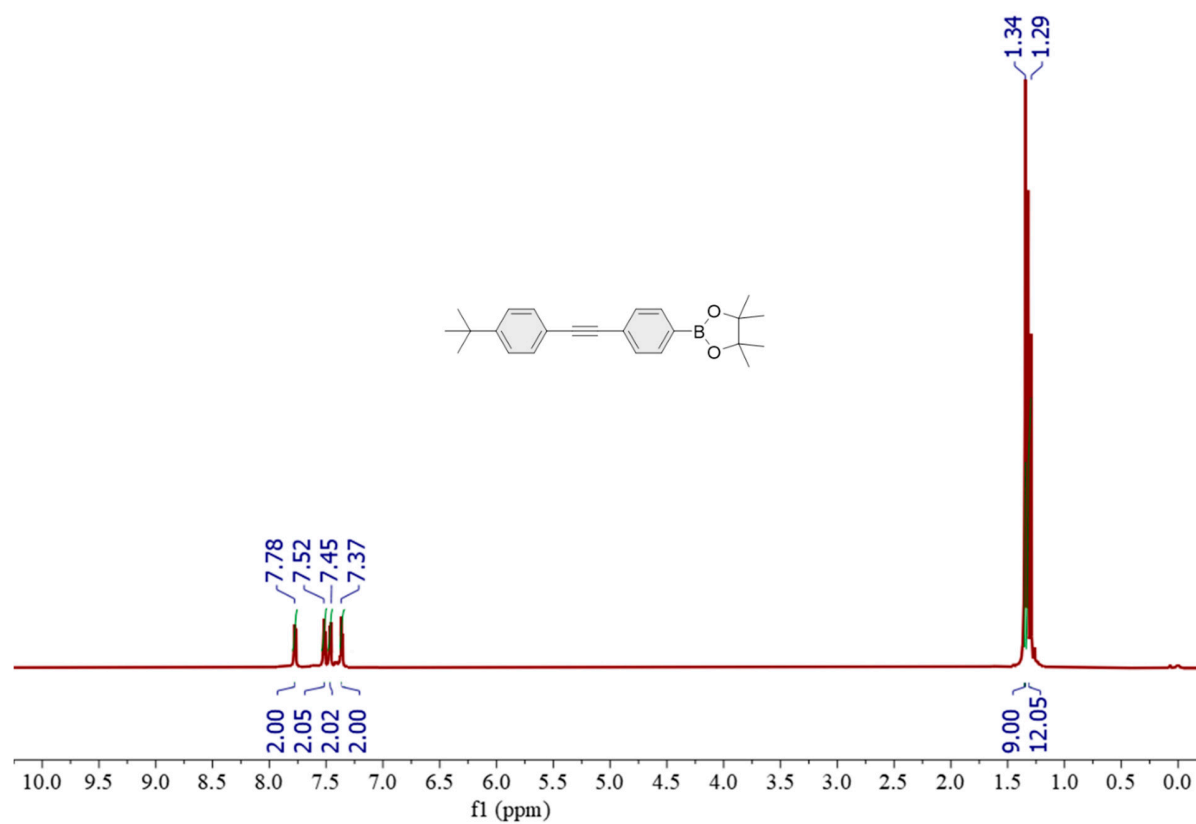

**Figure S1:**  $^1\text{H}$  NMR spectrum of **4** ( $\text{CDCl}_3$ , 600 MHz)

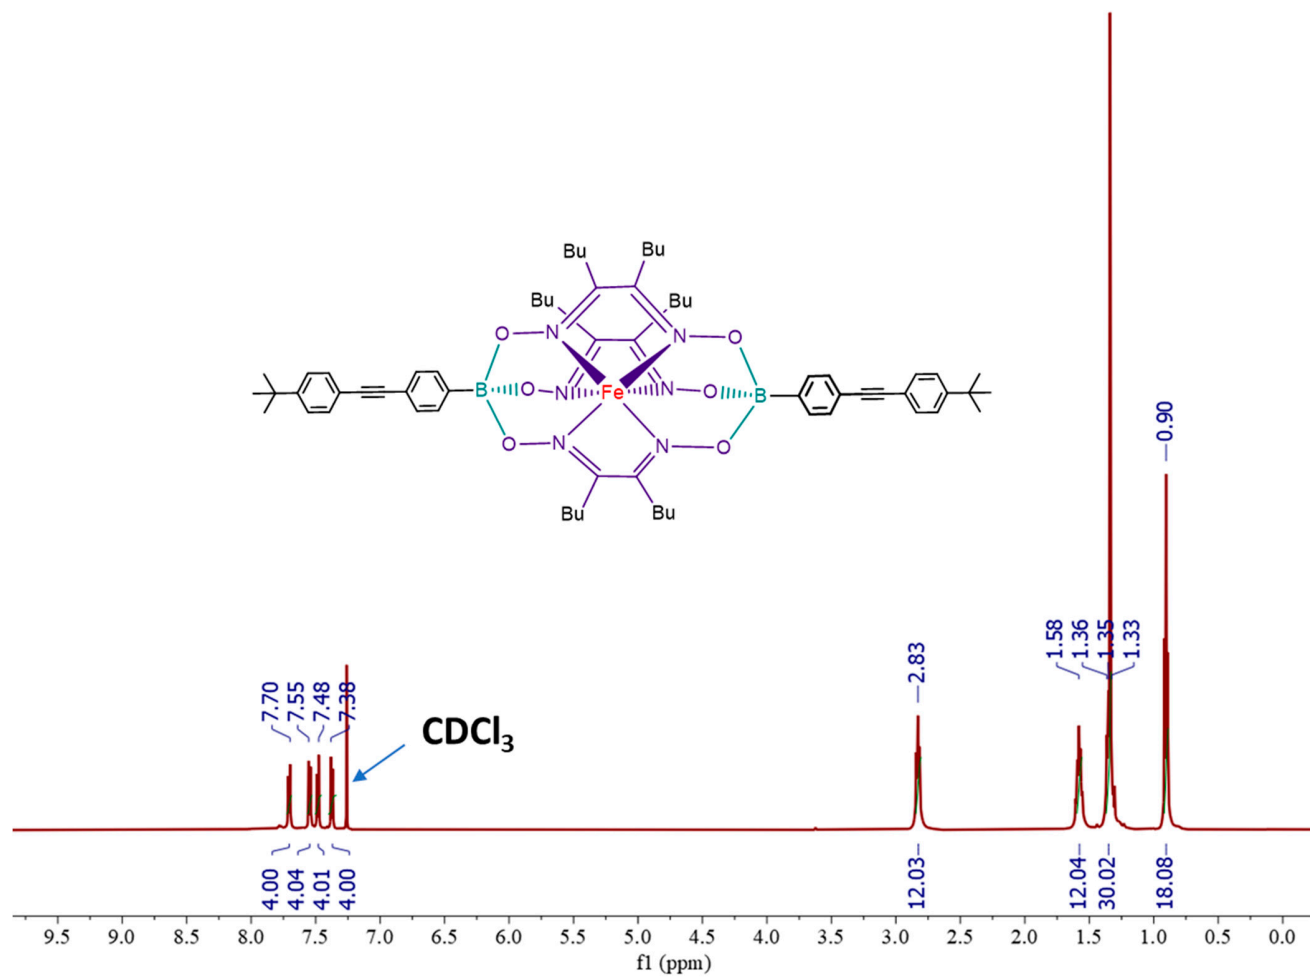

**Figure S2:**  $^1\text{H}$  NMR spectrum of **CM1** ( $\text{CDCl}_3$ , 600 MHz)

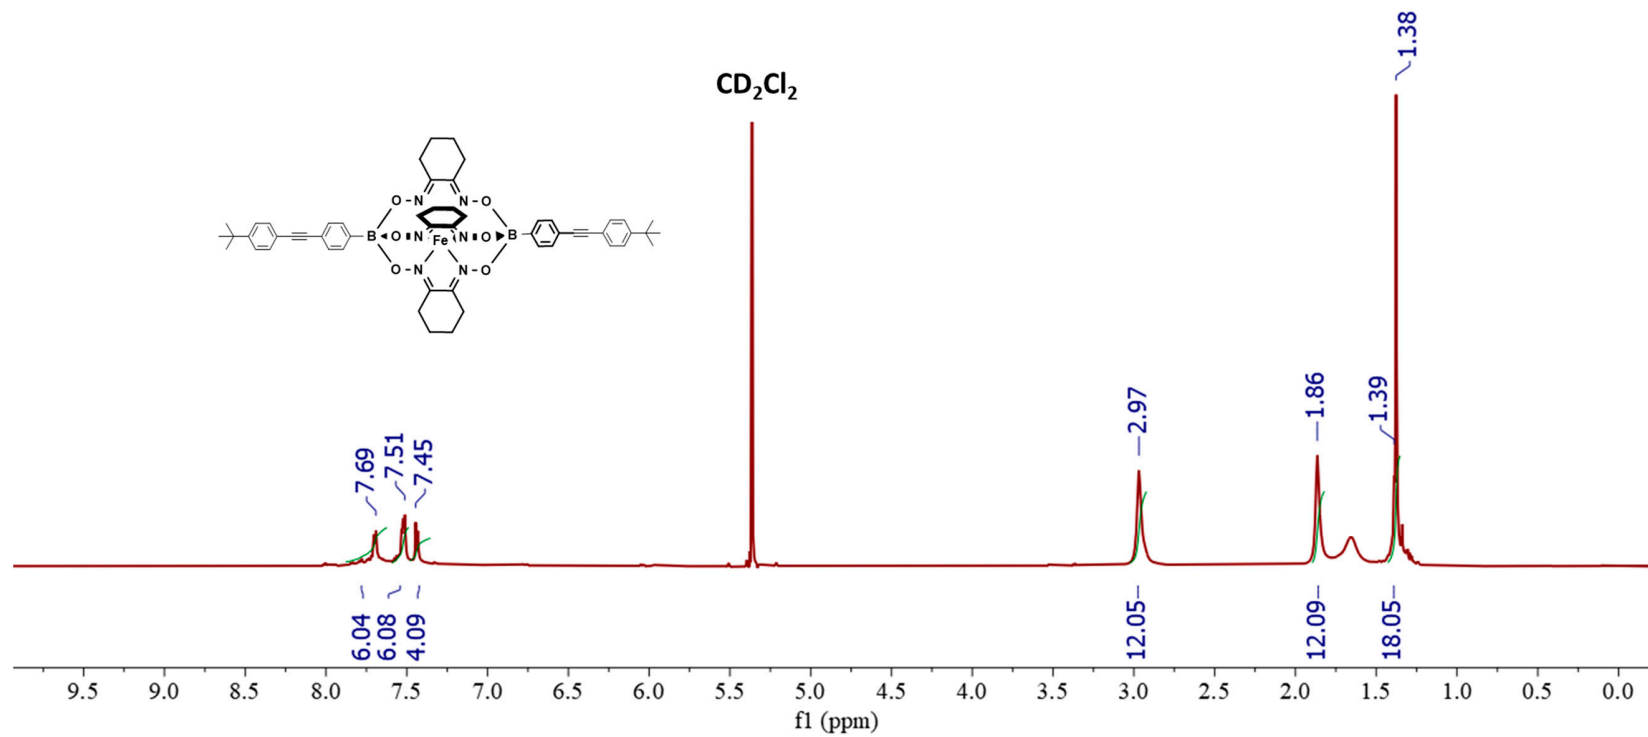

**Figure S3:**  $^1\text{H}$  NMR spectrum of **CM2** ( $\text{CD}_2\text{Cl}_2$ , 600 MHz)

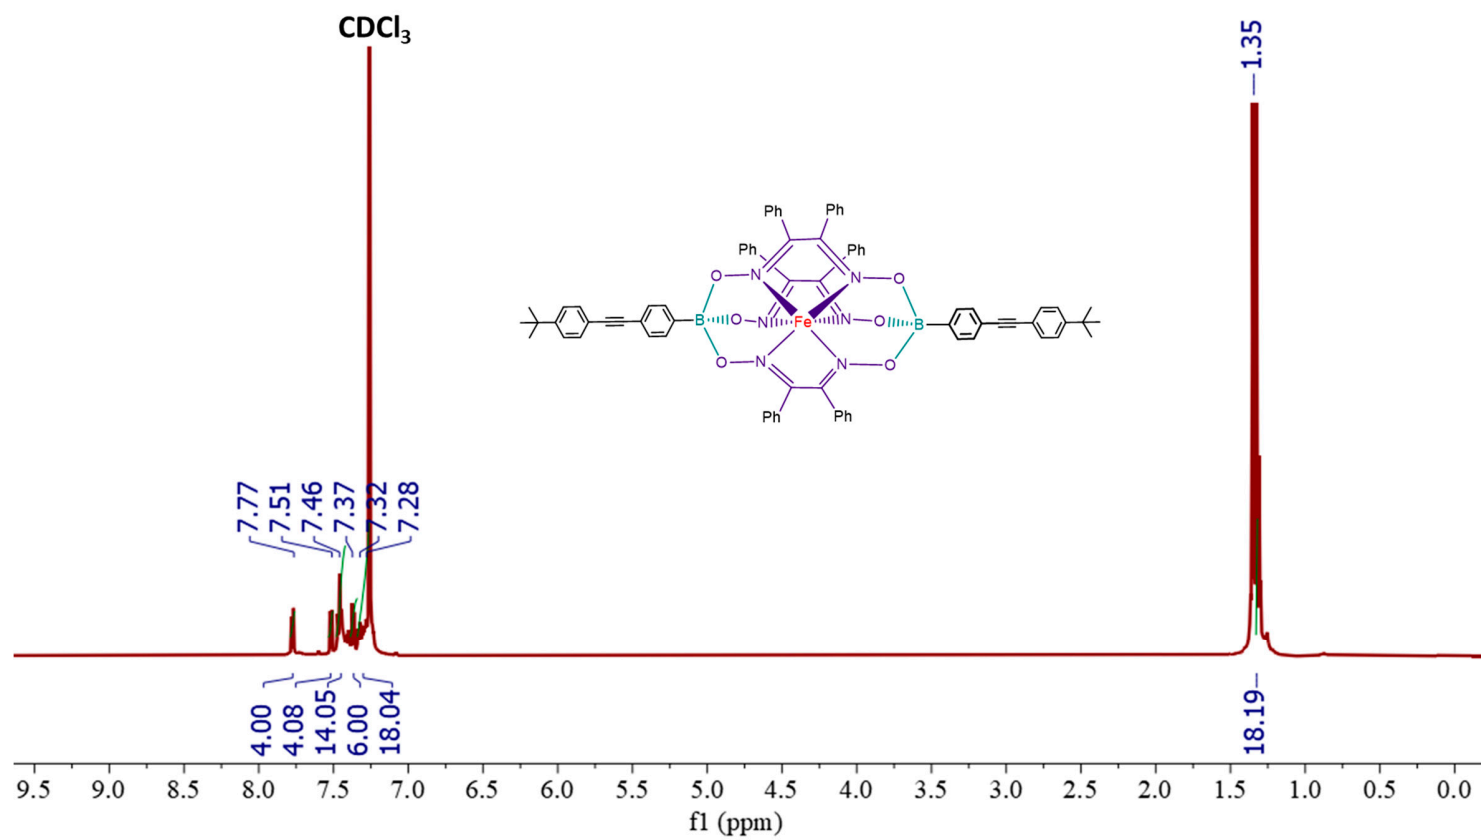

Figure S4:  $^1\text{H}$  NMR spectrum of CM3 ( $\text{CDCl}_3$ , 600 MHz)

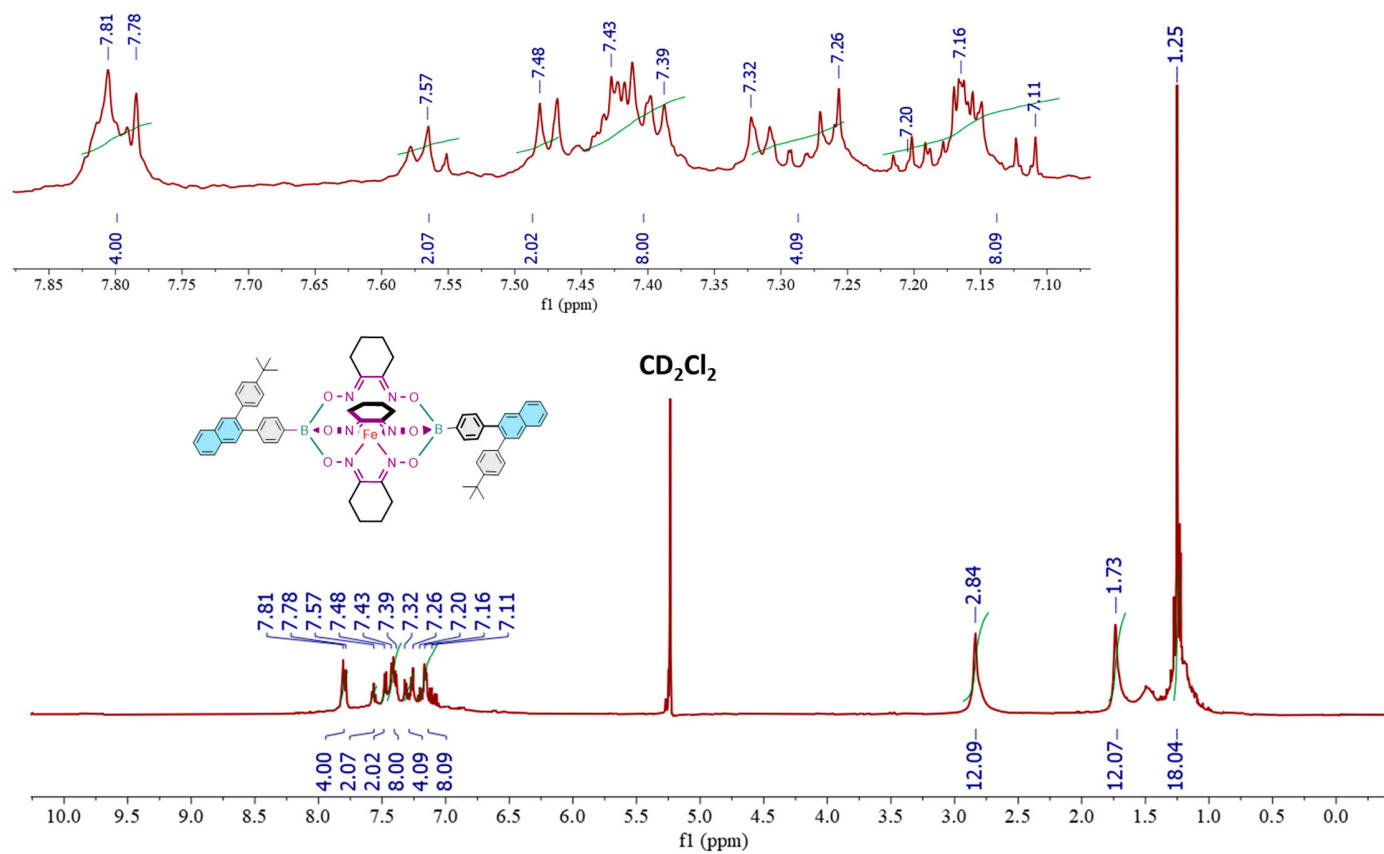

**Figure S5:**  $^1\text{H}$  NMR spectrum of **CBM** ( $\text{CD}_2\text{Cl}_2$ , 600 MHz)



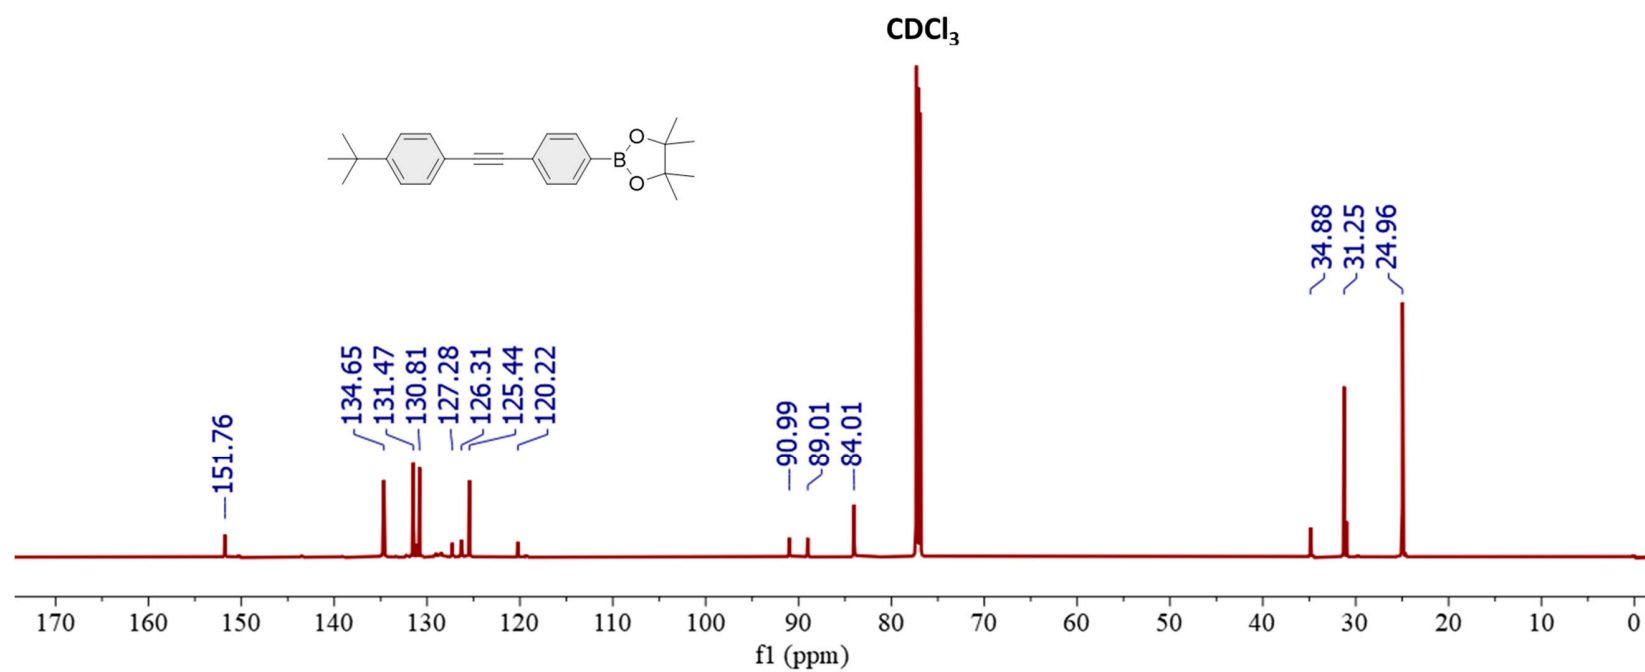

**Figure S6:**  $^{13}\text{C}$  NMR spectrum of 4 (CDCl<sub>3</sub>, 150 MHz)

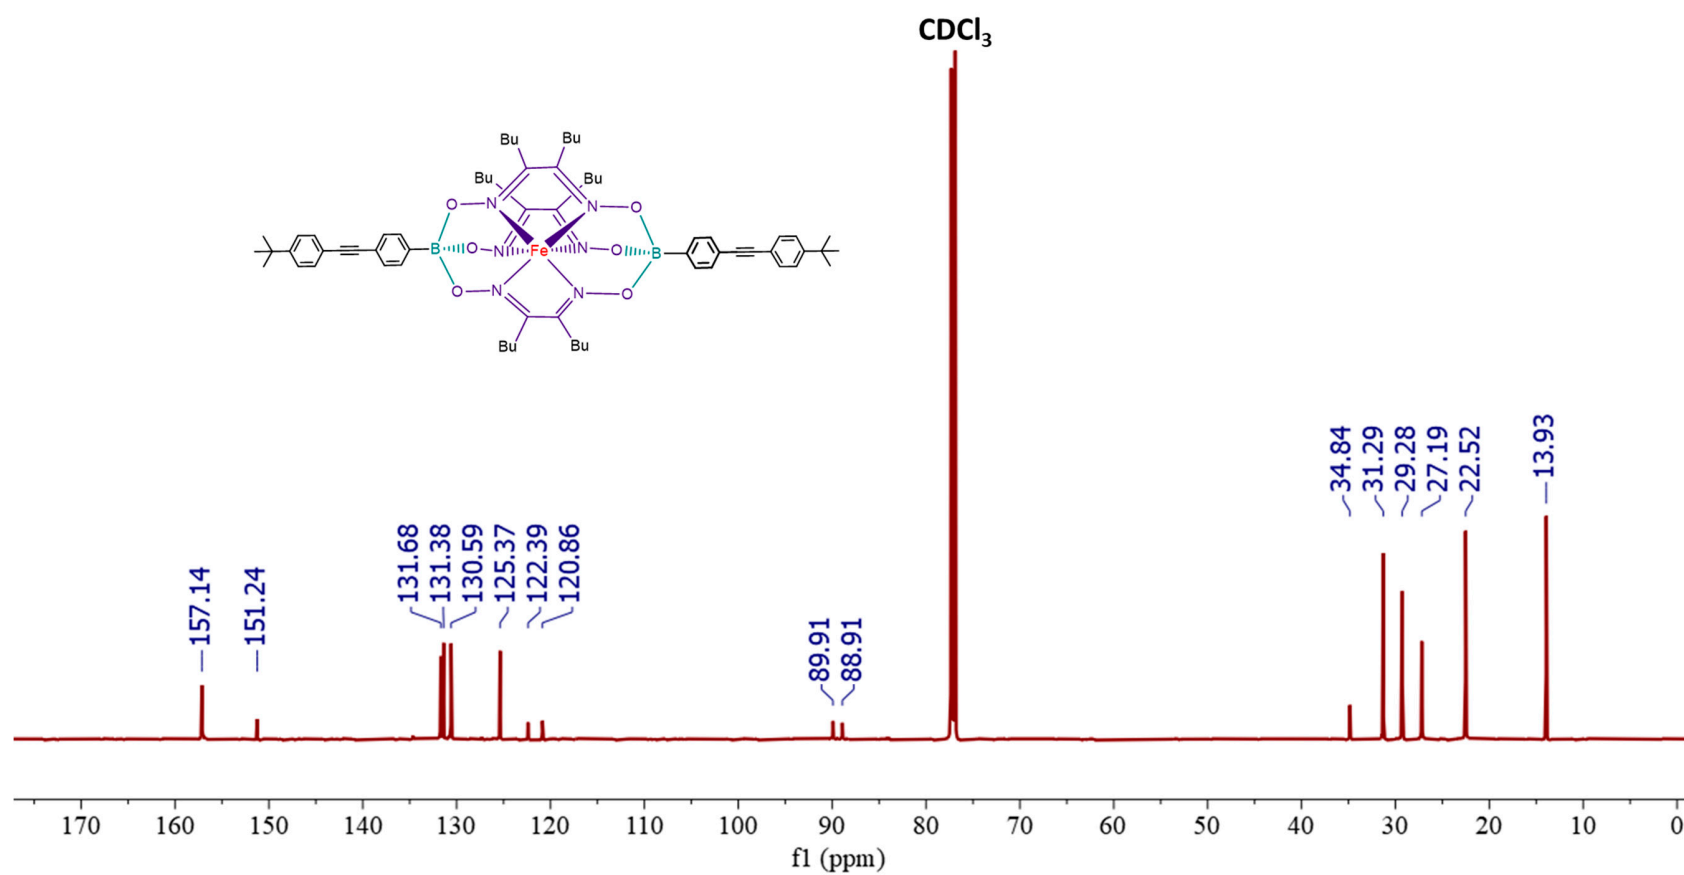

Figure S7:  $^{13}\text{C}$  NMR spectrum of CM1 (CDCl<sub>3</sub>, 150 MHz)

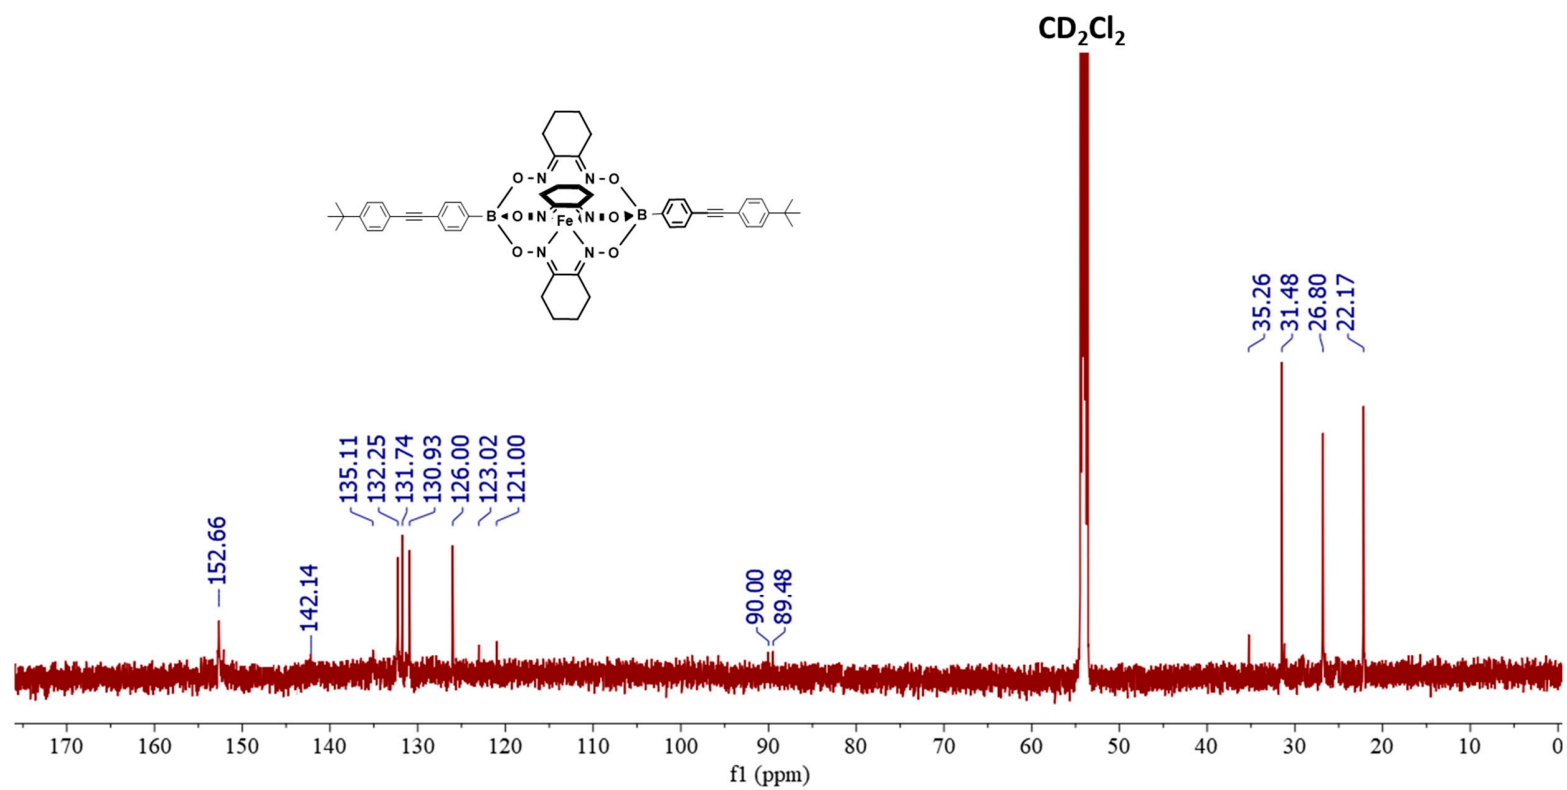

**Figure S8:** <sup>13</sup>C NMR spectrum of CM2 (CD<sub>2</sub>Cl<sub>2</sub>, 150 MHz)

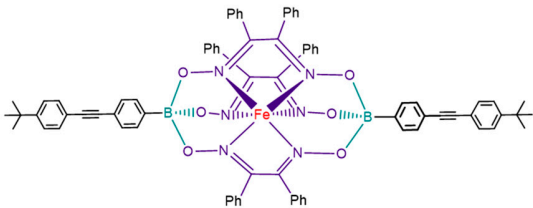

**Figure S9:**  $^{13}\text{C}$  NMR spectrum of **CM3** ( $\text{CDCl}_3$ , 150 MHz)

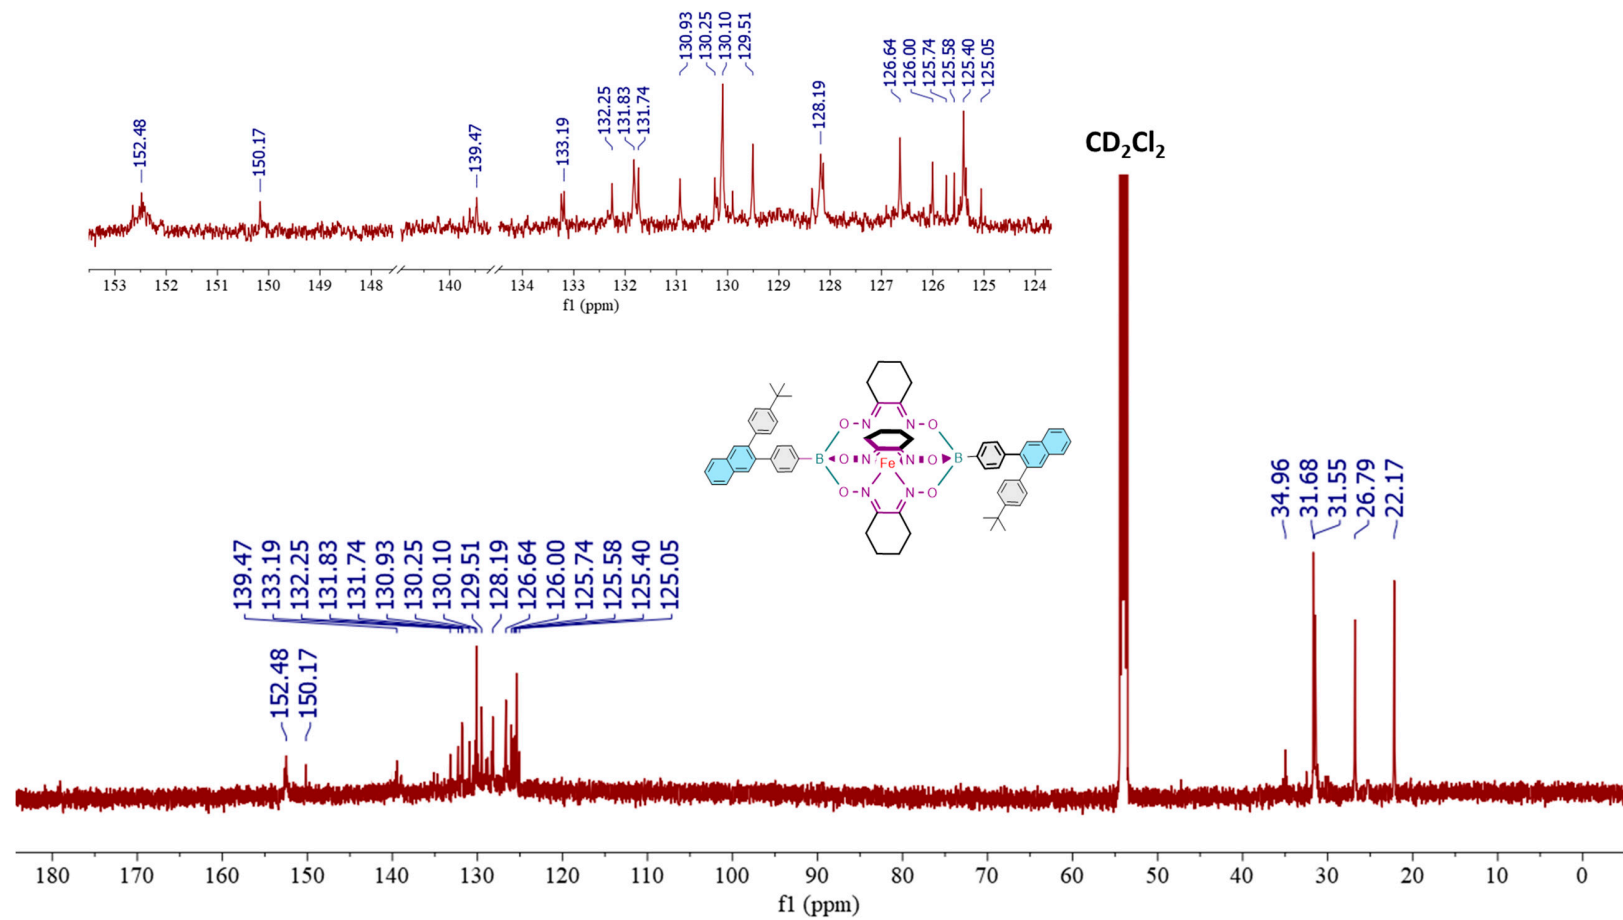

**Figure S10:** <sup>13</sup>C NMR spectrum of **CBM** (CD<sub>2</sub>Cl<sub>2</sub>, 150 MHz)

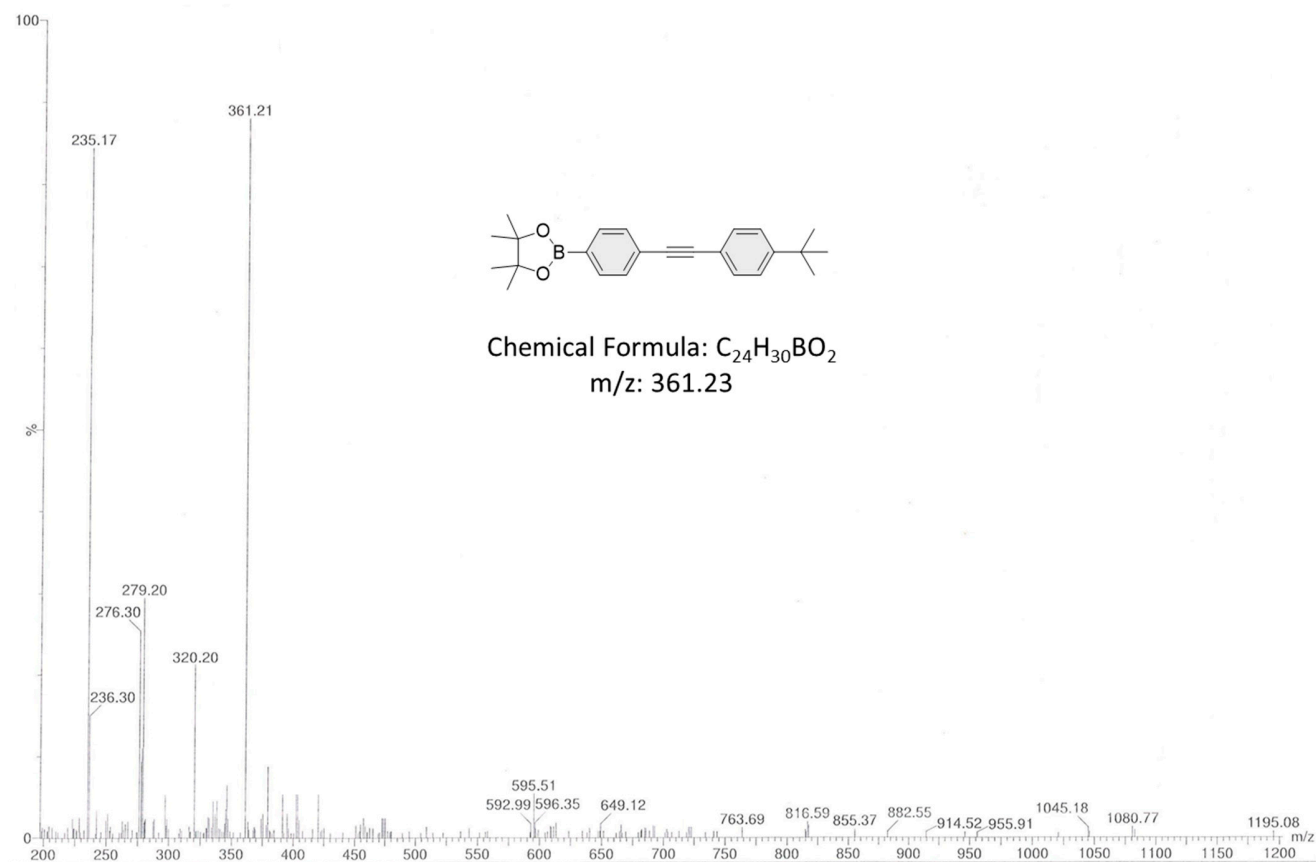

**Figure S11:** Electrospray ionization (ESI) mass spectrum of **4**

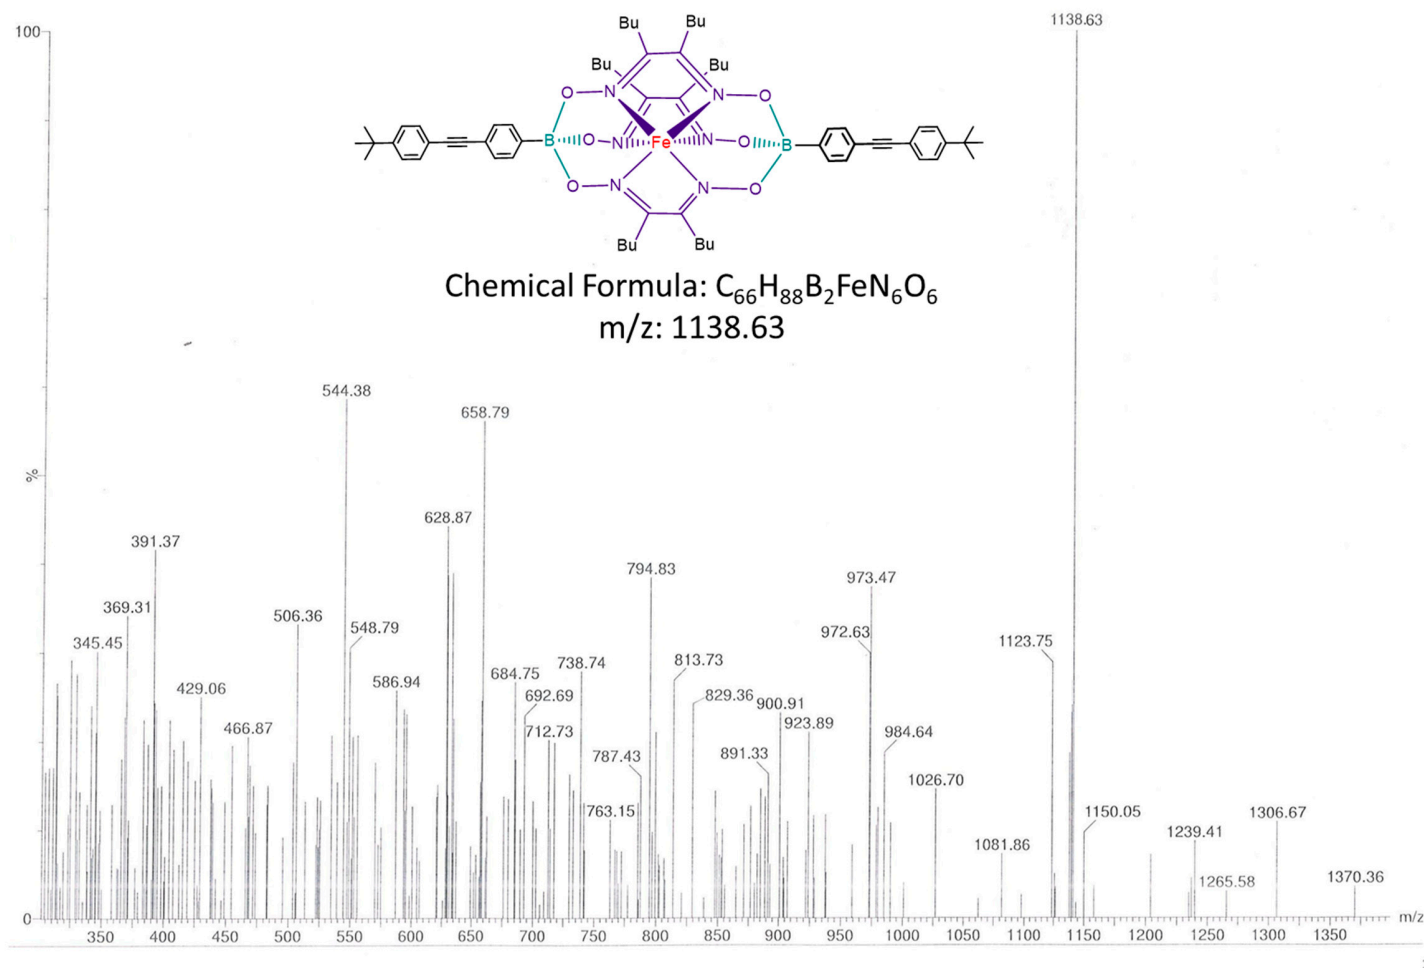

**Figure S12:** Electrospray ionization (ESI) mass spectrum of CM1

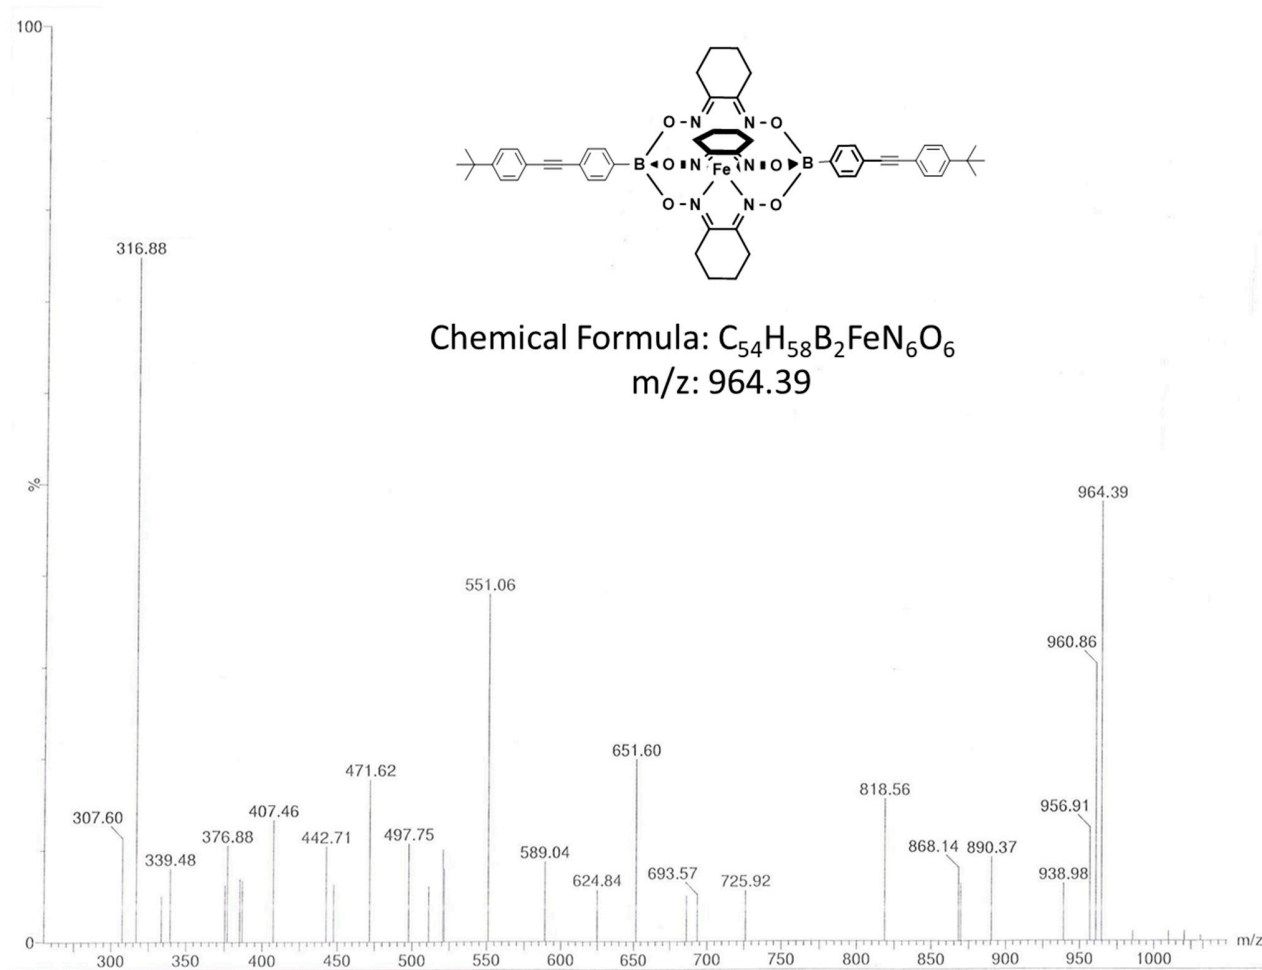

**Figure S13:** Electrospray ionization (ESI) mass spectrum of **CM2**



|                         | C     | $\Delta$ | H    | $\Delta$ | N    | $\Delta$ |
|-------------------------|-------|----------|------|----------|------|----------|
| Theoretical composition | 74.42 |          | 5.12 |          | 6.68 |          |
| Elemental analysis 1    | 74.40 | 0.02     | 5.09 | 0.03     | 6.65 | 0.03     |
| Elemental analysis 2    | 74.39 | 0.03     | 5.08 | 0.04     | 6.66 | 0.02     |
| Elemental analysis 3    | 74.41 | 0.01     | 5.12 | 0.00     | 6.67 | 0.01     |
| Average                 | 74.40 | 0.02     | 5.10 | 0.02     | 6.66 | 0.02     |

**Table S2:** CHN Analysis of **CM3**

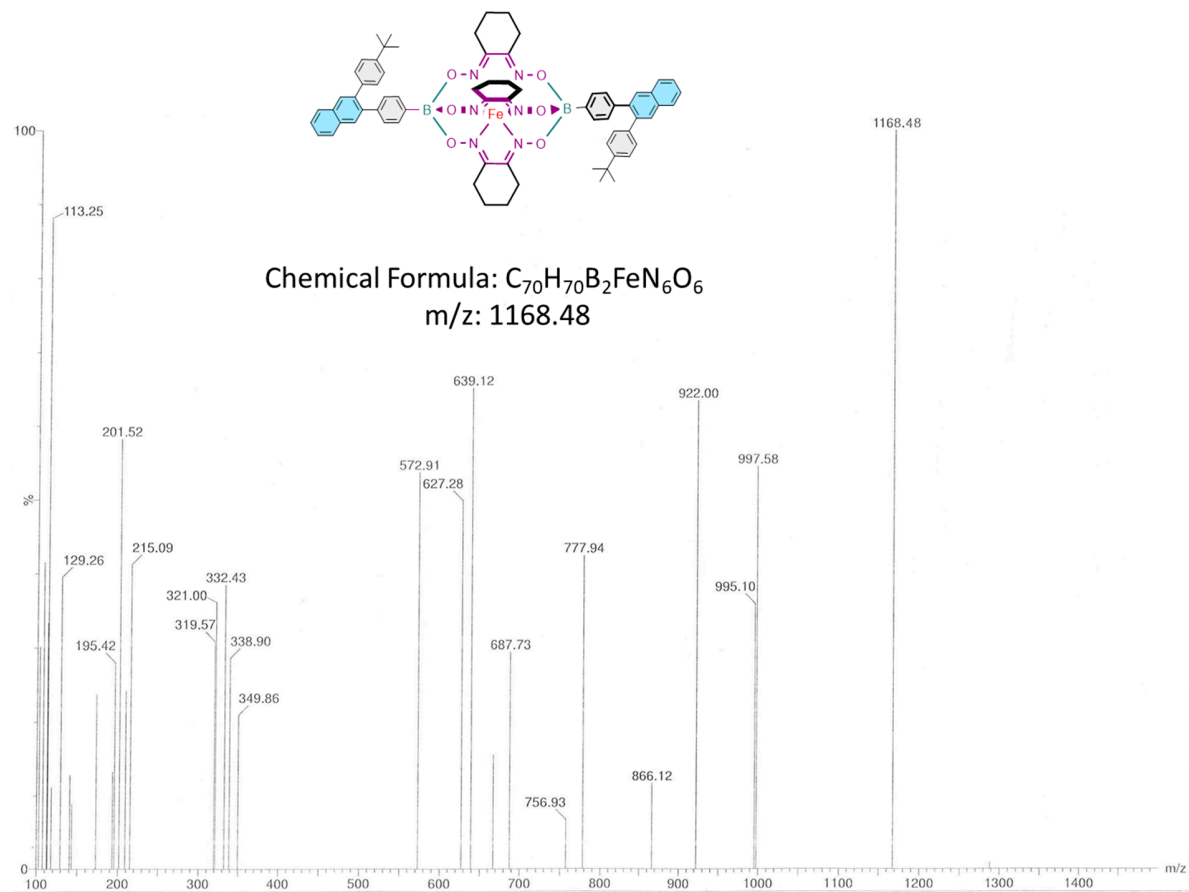

**Figure S14:** Electrospray ionization (ESI) mass spectrum of CBM

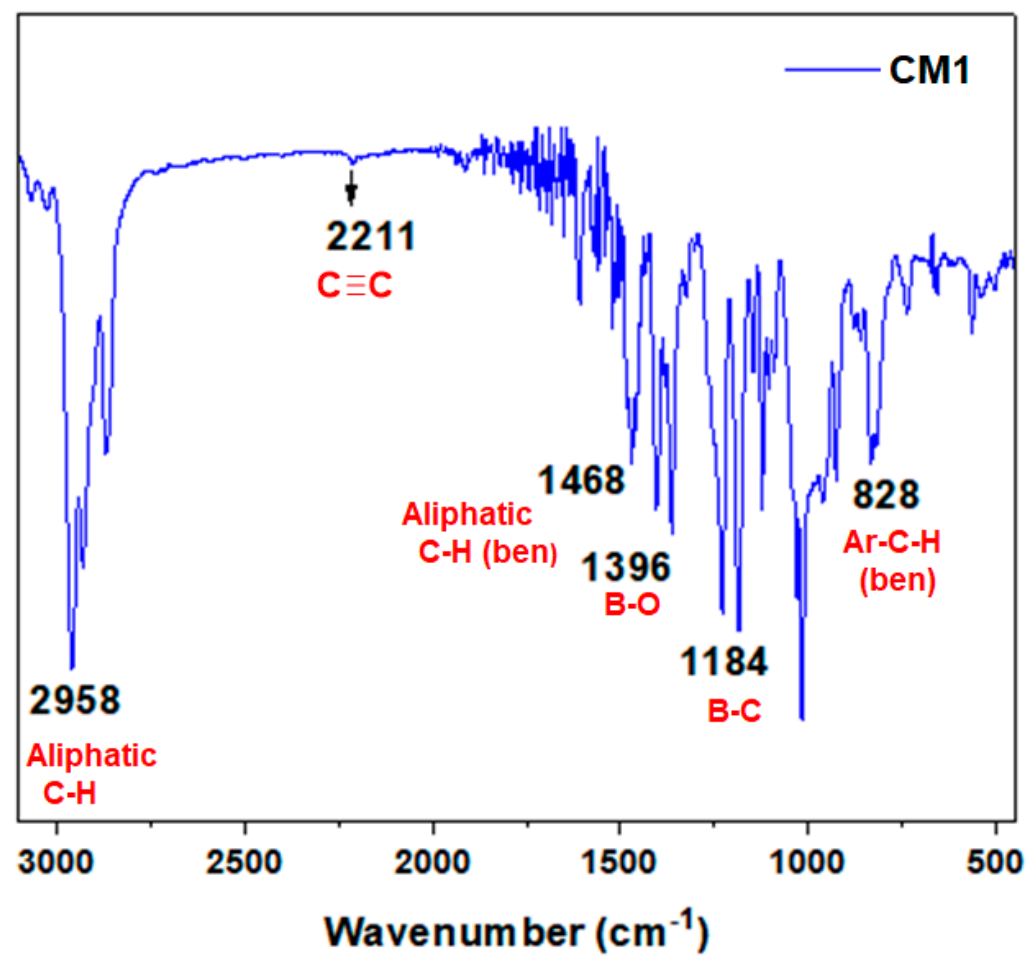

Figure S15: FT-IR spectrum of CM1

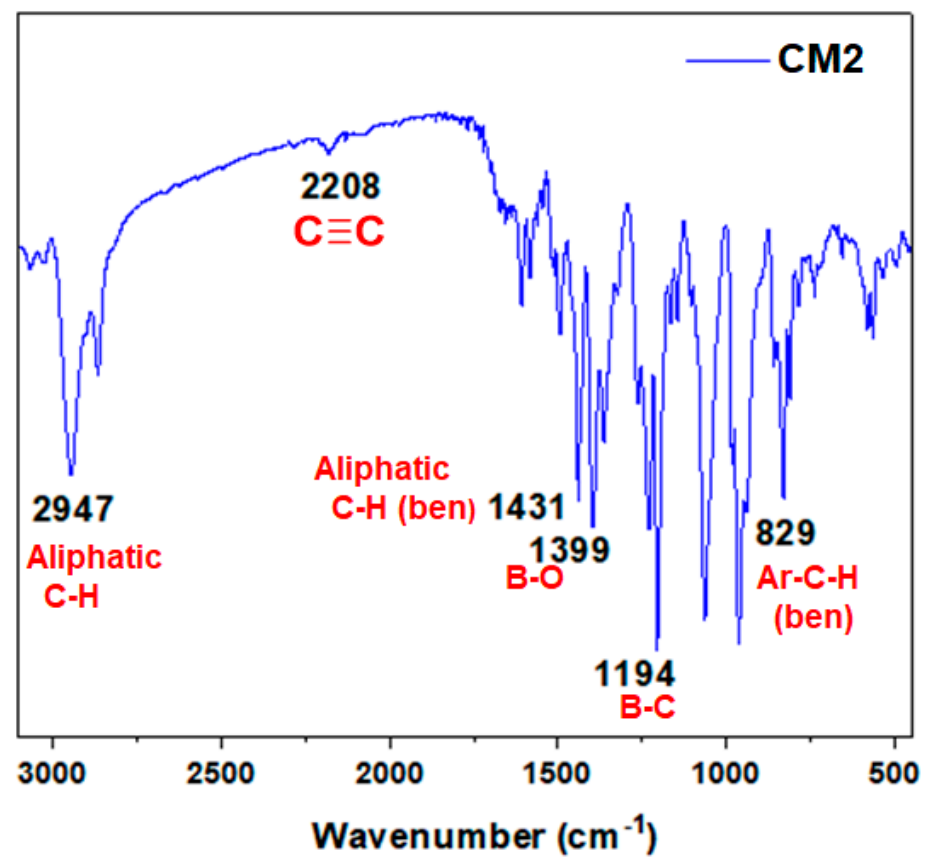

Figure S16: FT-IR spectrum of CM2

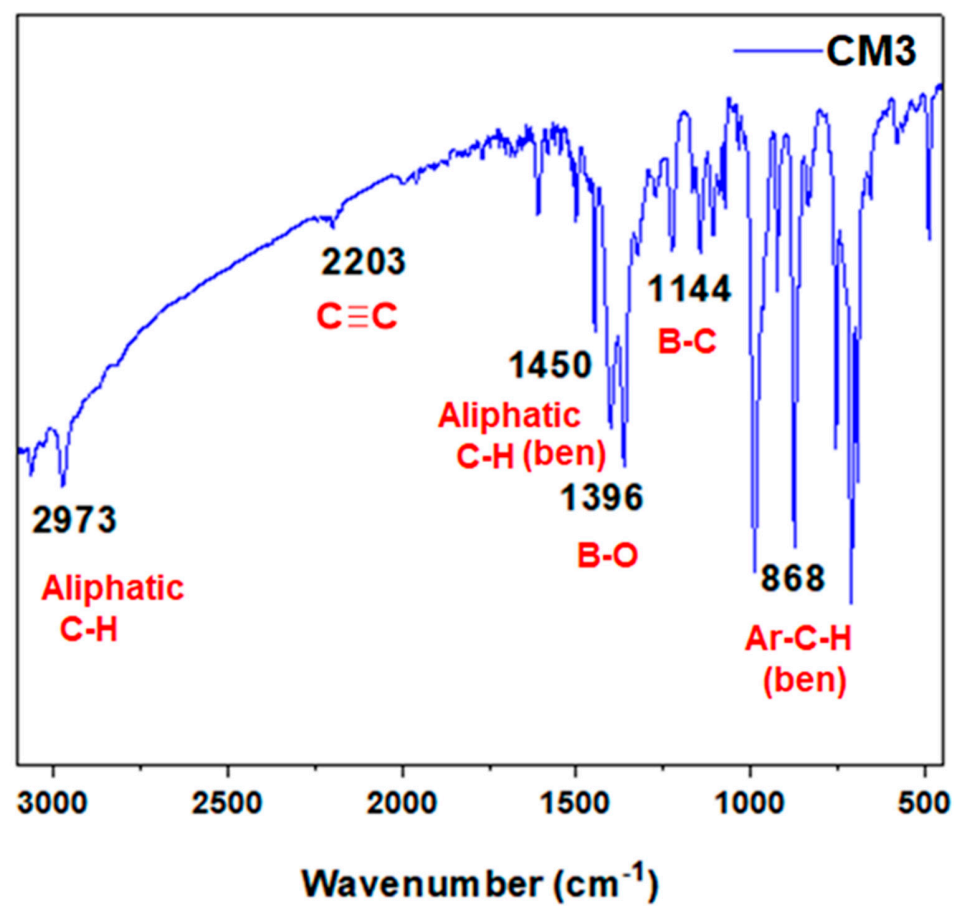

Figure S17: FT-IR spectrum of CM3

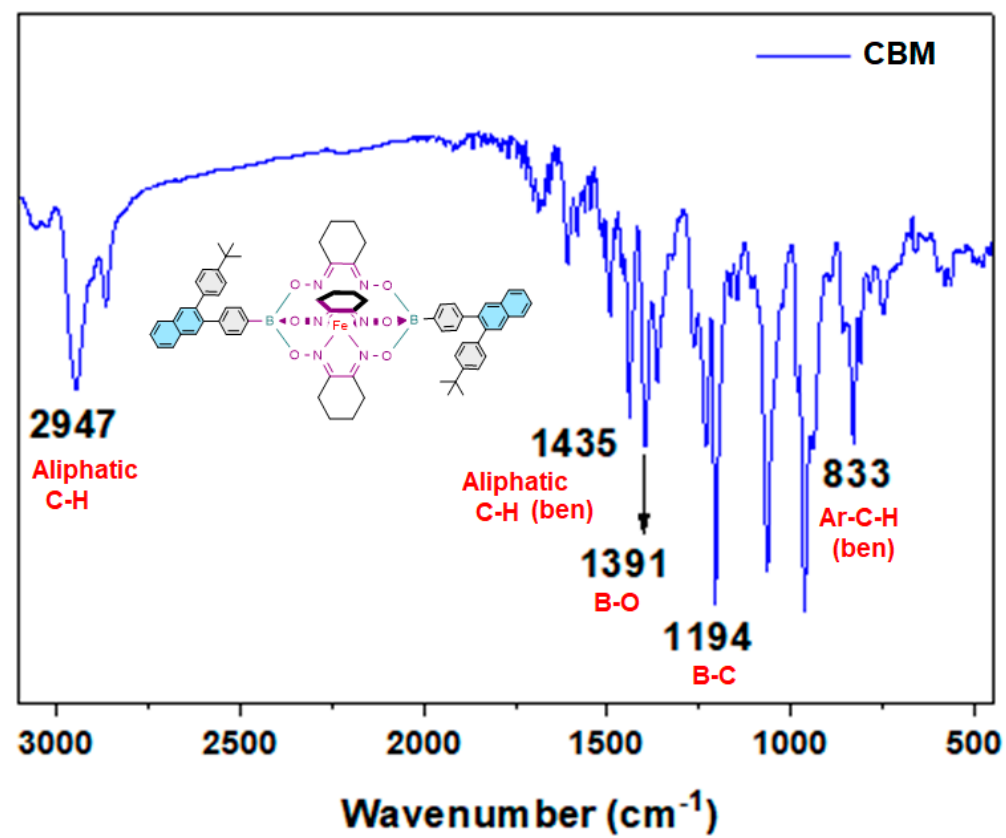

Figure S18: FT-IR spectrum of CBM

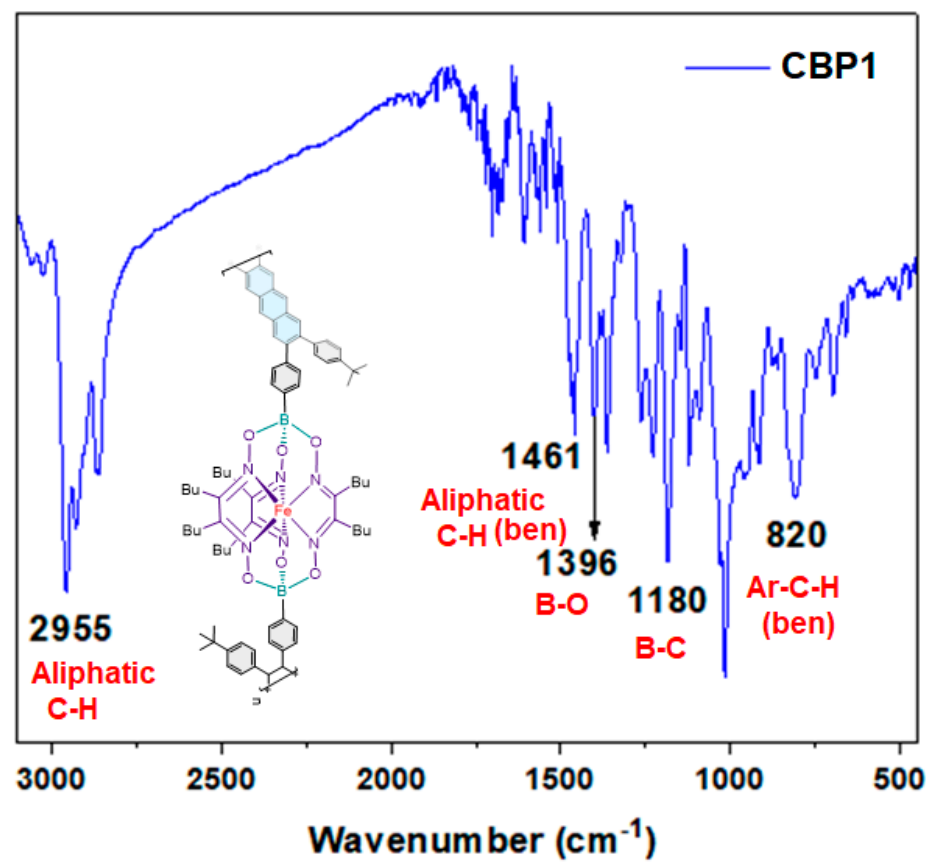

Figure S19: FT-IR spectrum of CBP1

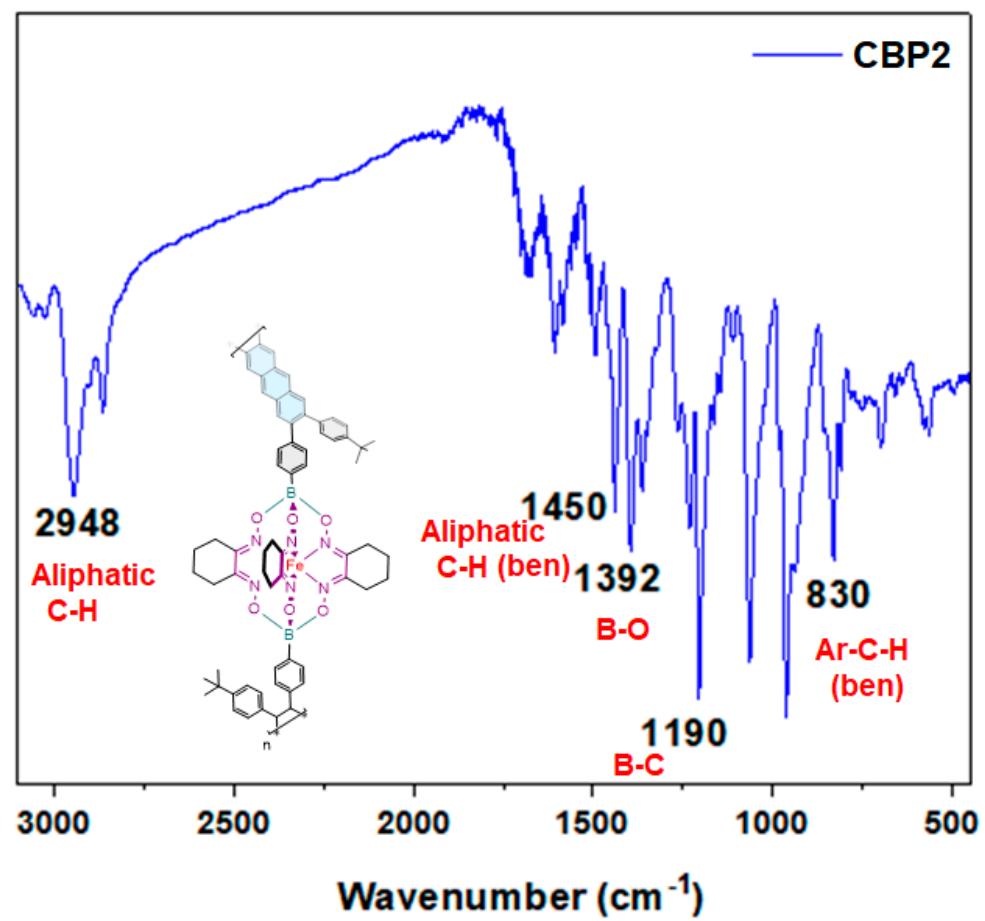

Figure S20: FT-IR spectrum of CBP2



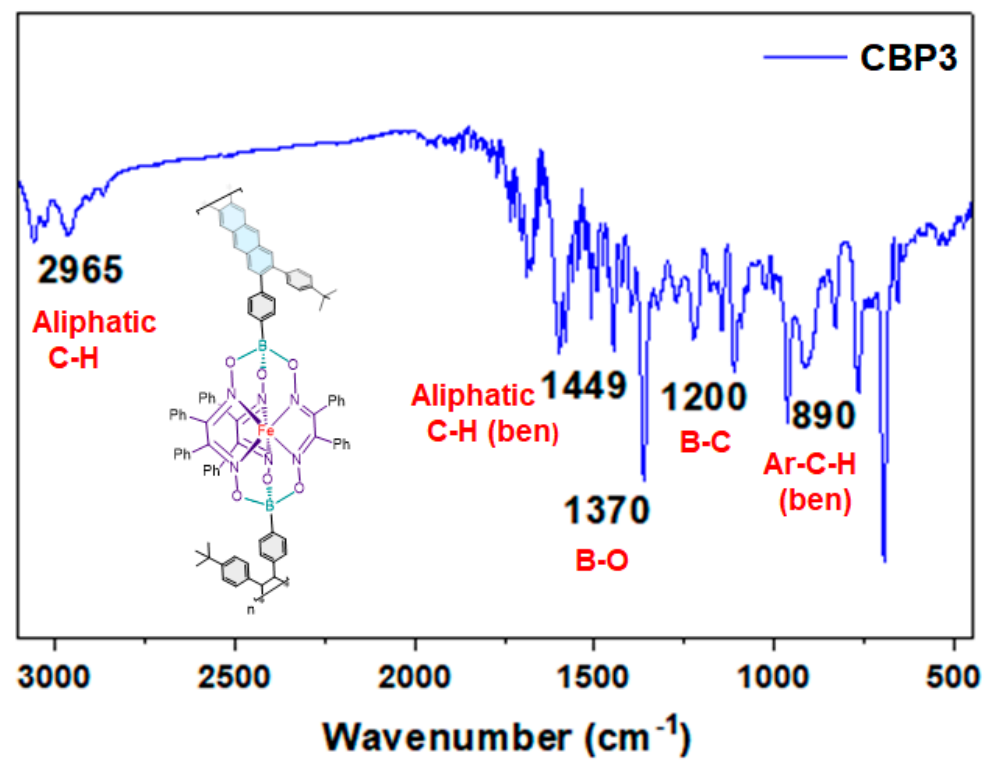

Figure S21: FT-IR spectrum of CBP3

| CBP1   | Peak BE |
|--------|---------|
| B 1s   | 191.15  |
| C 1s   | 284.81  |
| N 1s   | 400.54  |
| O 1s   | 532.26  |
| Fe 2p3 | 708.91  |
| Fe2p1  | 721.99  |

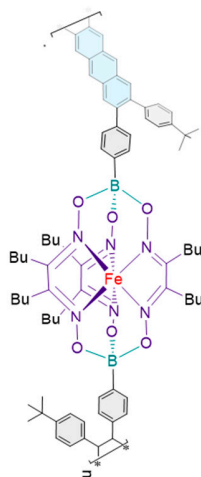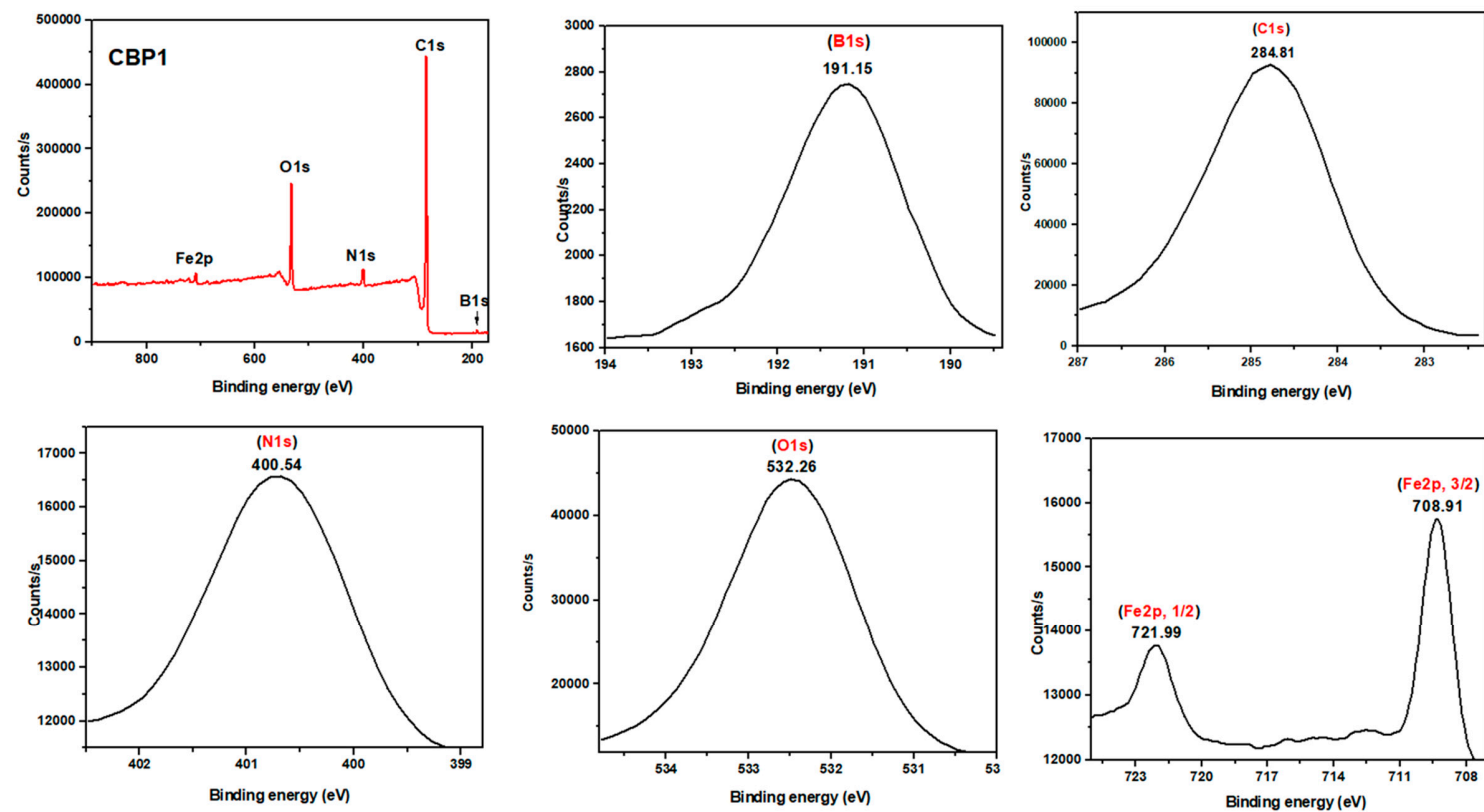

**Figure S22:** High-resolution XPS survey scan and spectra of B1s, C1s, N1s, O1s, and Fe2p of copolymer CBP1

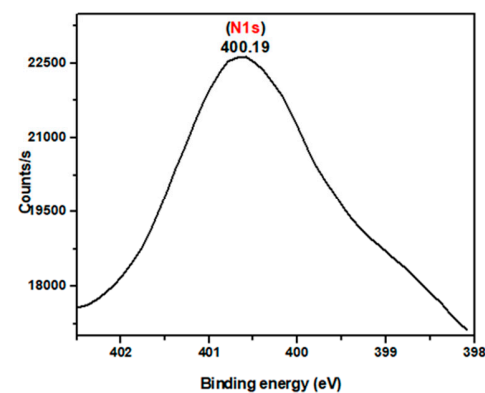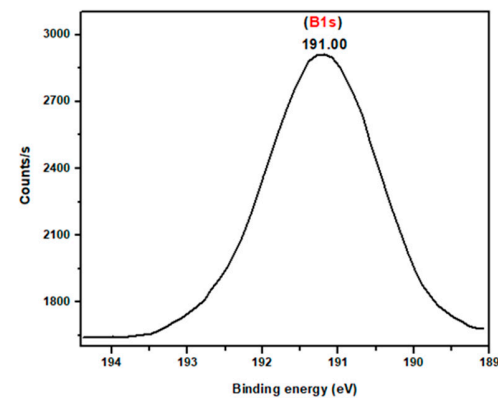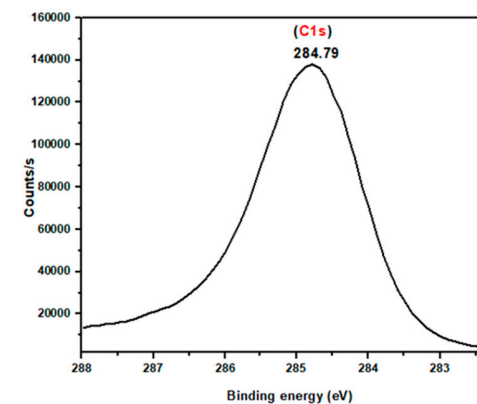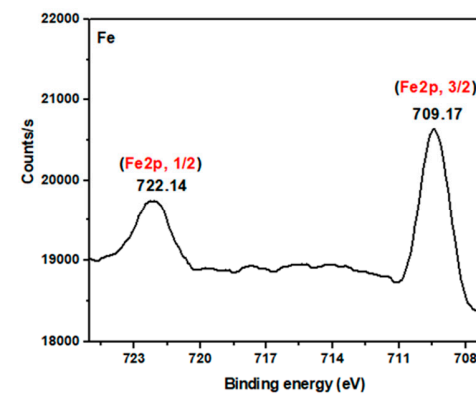

**Figure S23:** High-resolution XPS survey scan and spectra of B1s, C1s, N1s, O1s, and Fe2p of copolymer **CBP3**

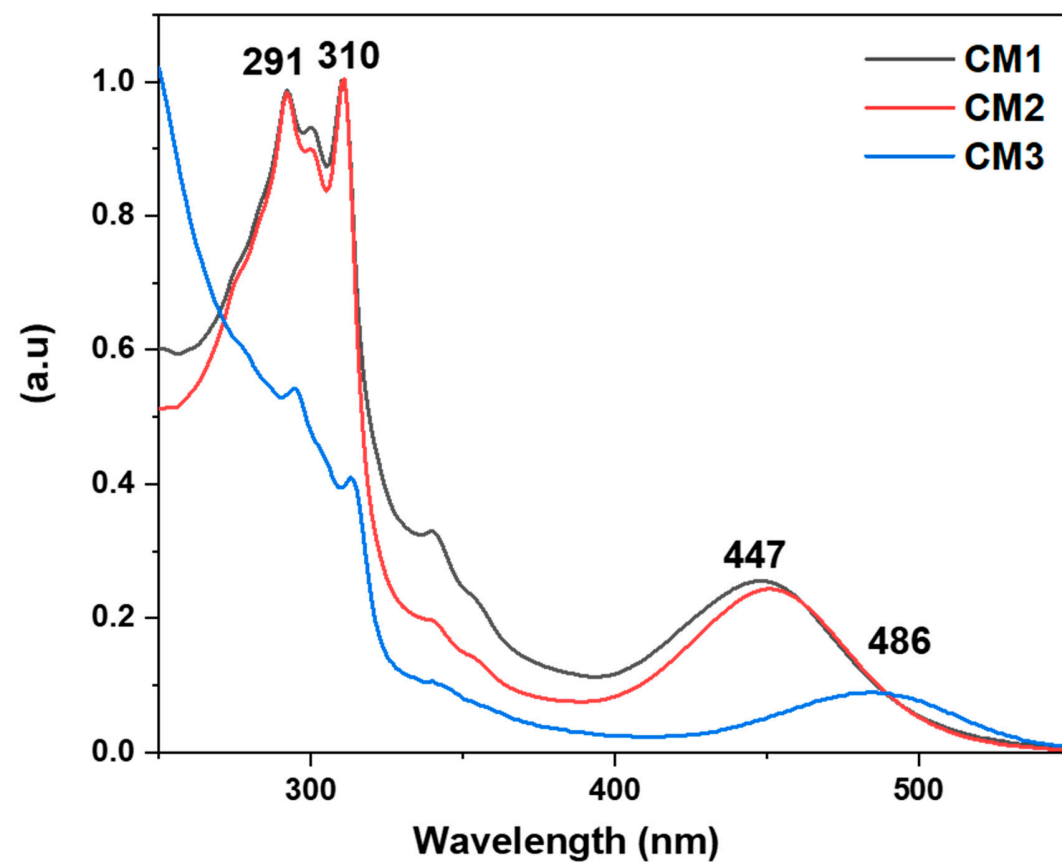

**Figure S24:** Normalized UV-VIS absorption spectra of **CM1-3** (CM =  $10^{-8}$  M in THF)

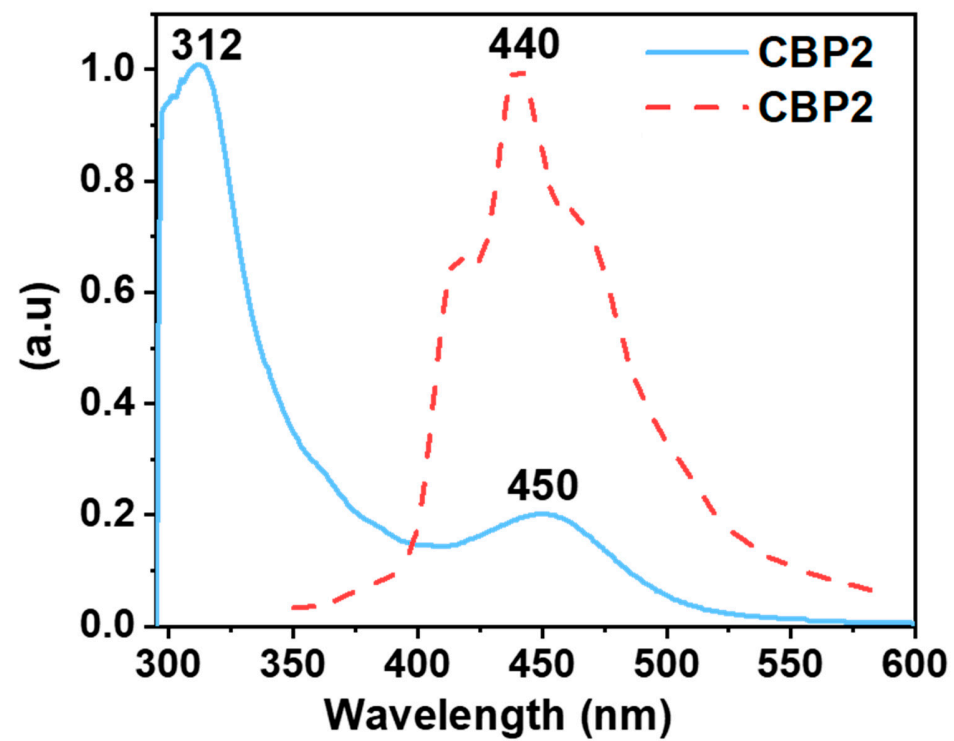

**Figure S25:** Normalized UV-VIS absorption (solid lines) and emission (dotted lines) spectra of **CBP2** (CM =  $10^{-8}$  M in THF)

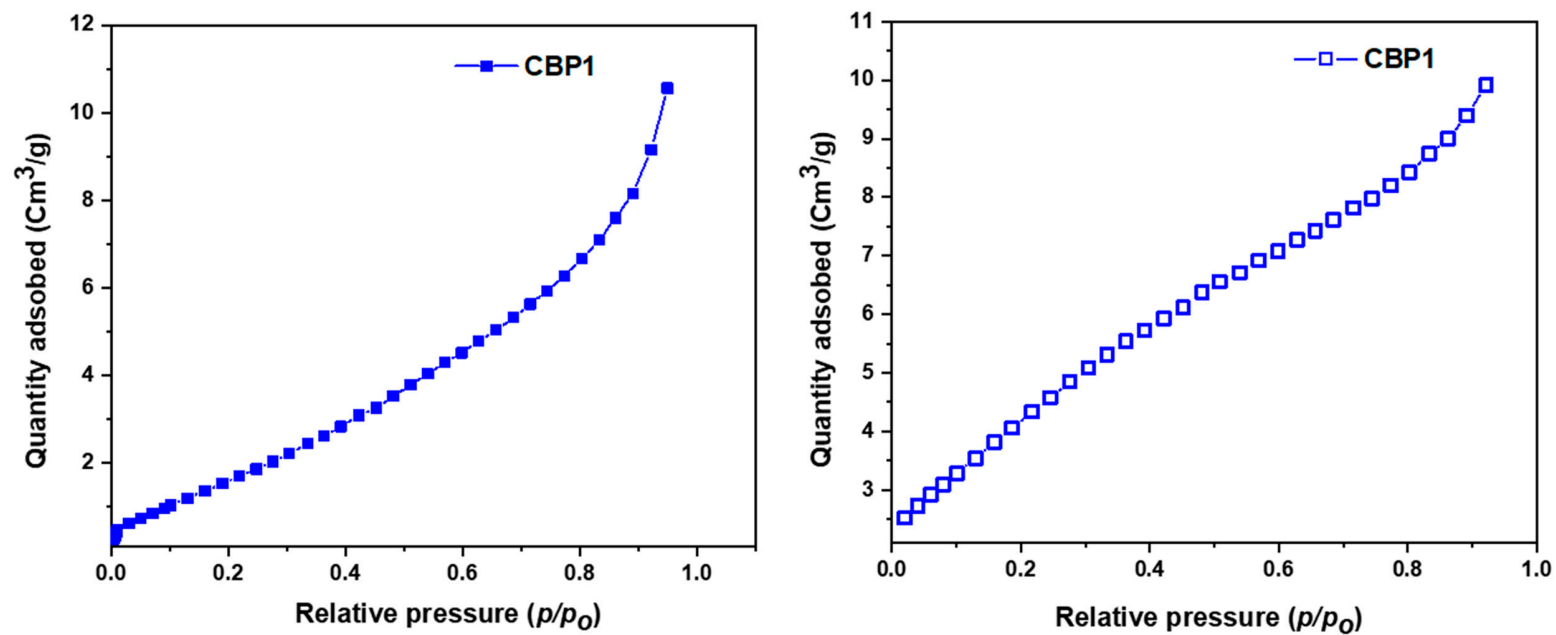

**Figure S26:** Nitrogen adsorption (left) and desorption isotherms (right) of **CBP1** measured at 77 K

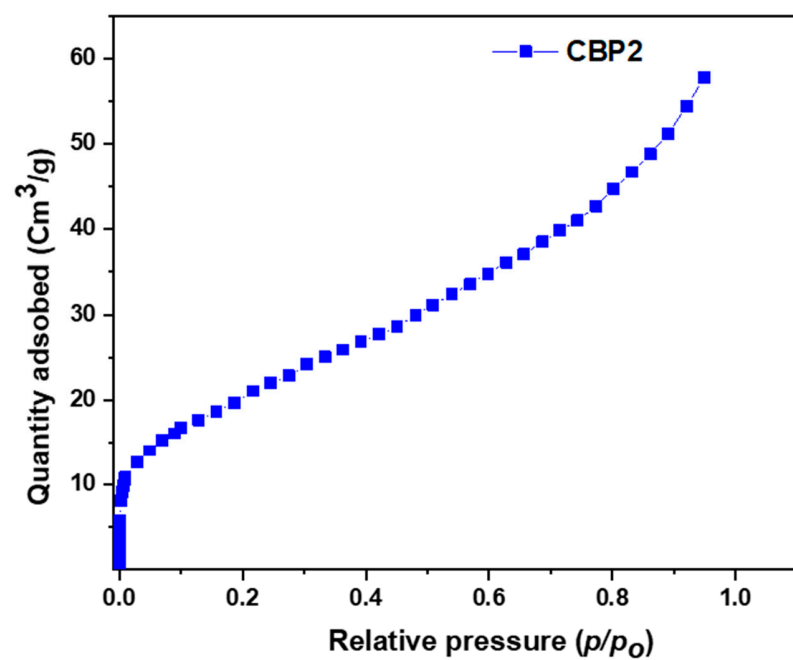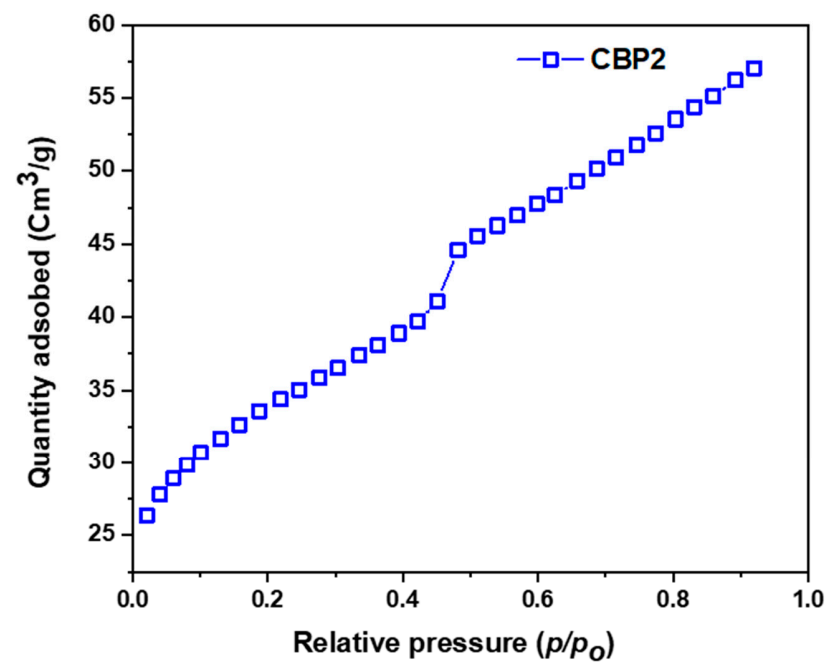

**Figure S27:** Nitrogen adsorption (left) and desorption isotherms (right) of **CBP2** measured at 77 K

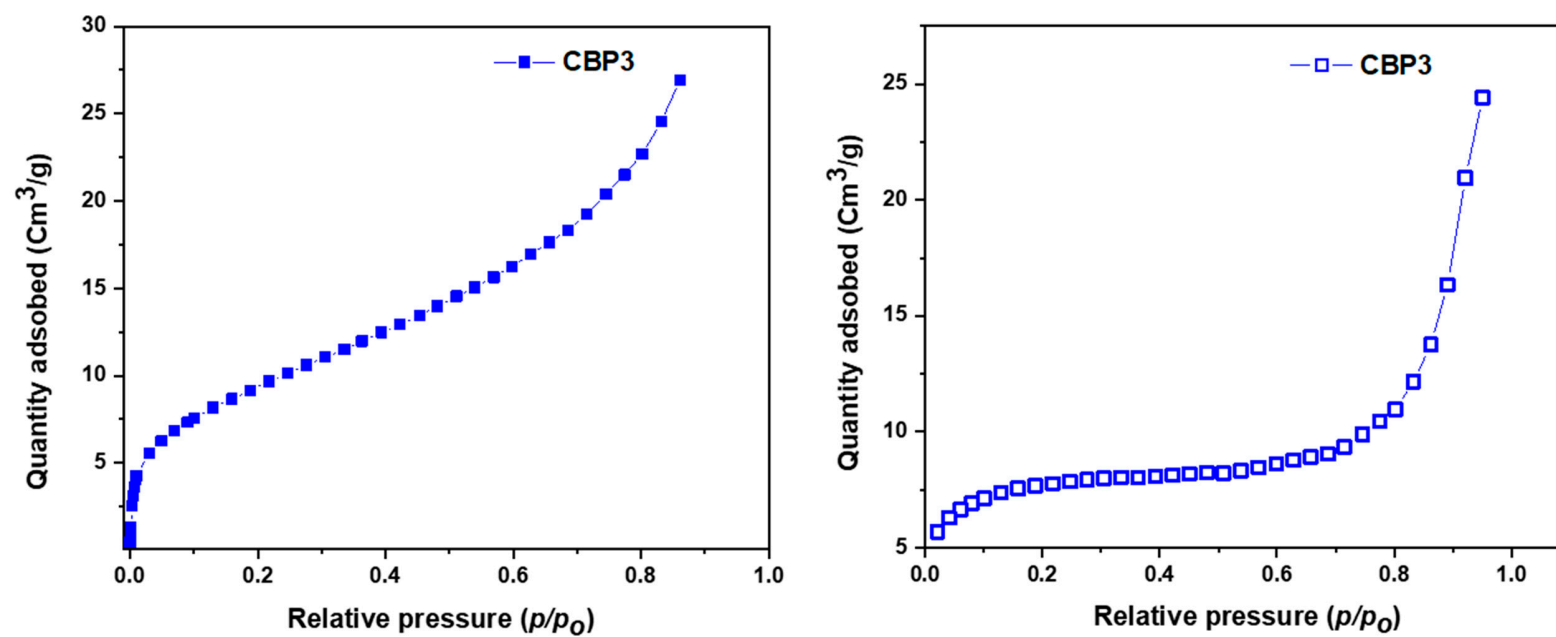

**Figure S28:** Nitrogen adsorption (left) and desorption isotherms (right) of **CBP3** measured at 77 K



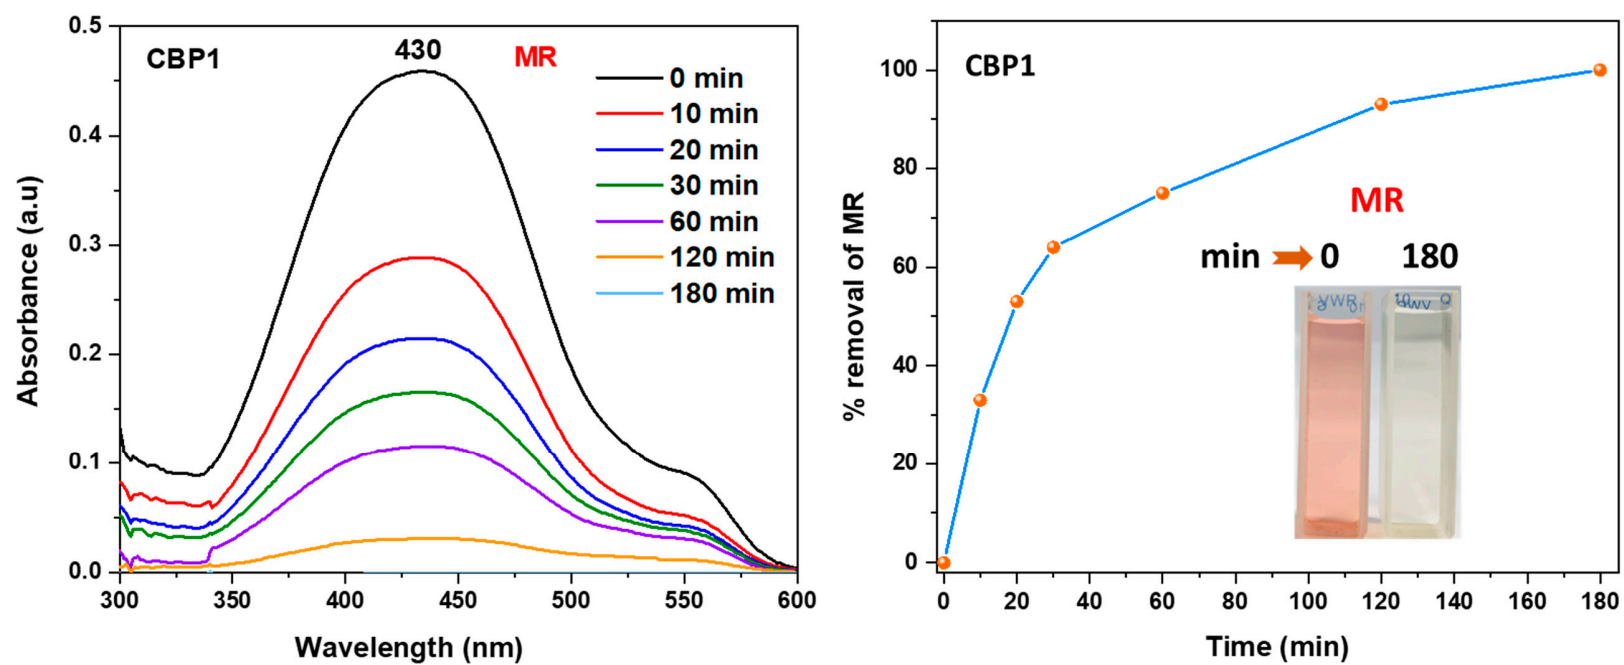

Figure S29: Methylene red (MR) dye adsorption by **CBP1** at various time intervals

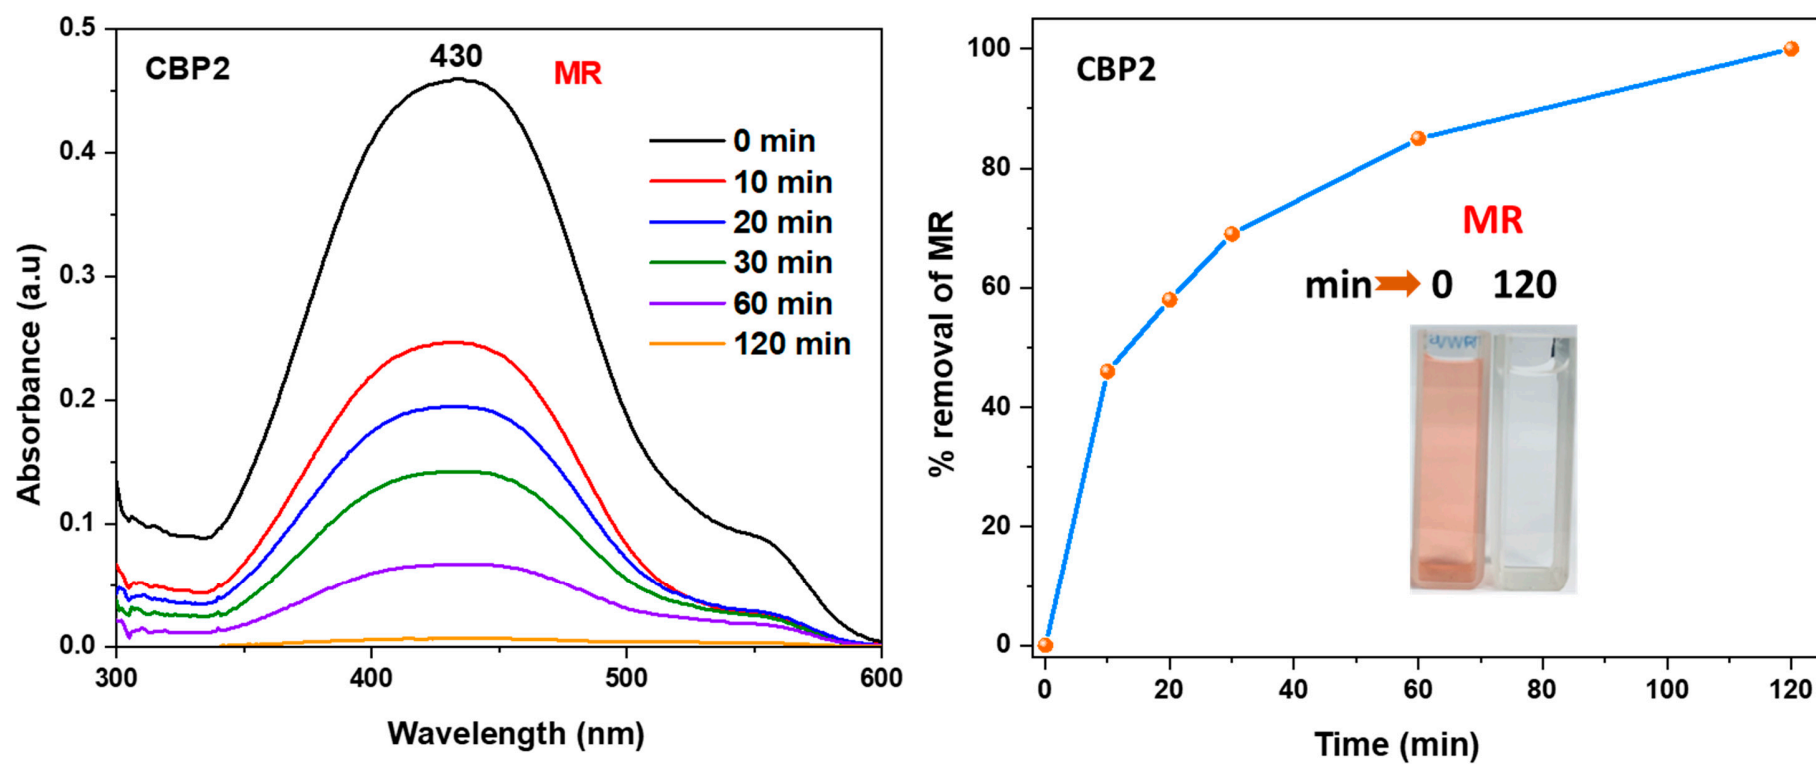

Figure S30: Methylene red (MR) dye adsorption by CBP2 at various time intervals

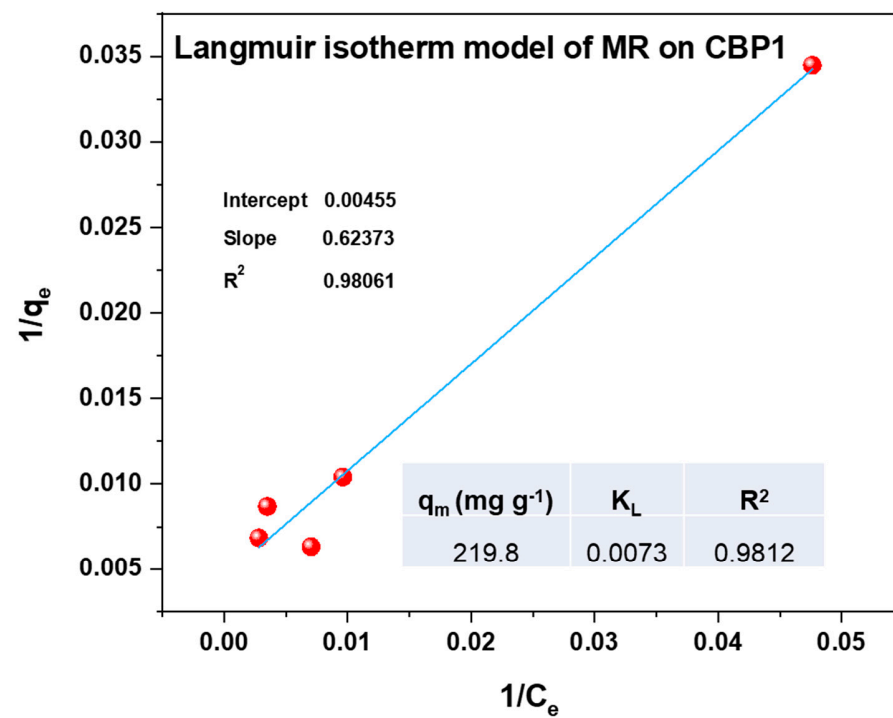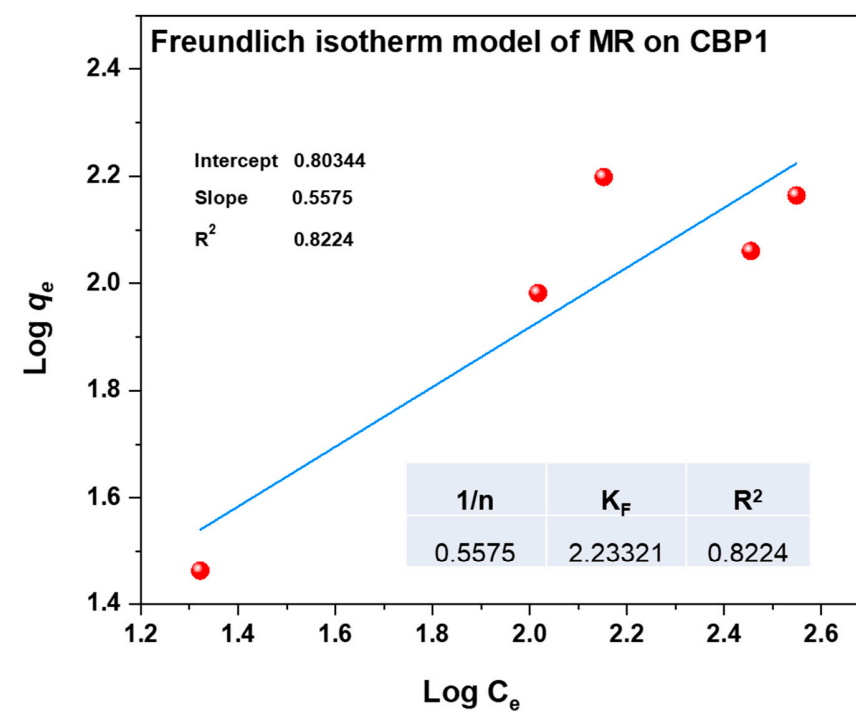

**Figure S31:** Linear Langmuir (left) and Freundlich (right) isotherm models of **MR** on **CBP1**

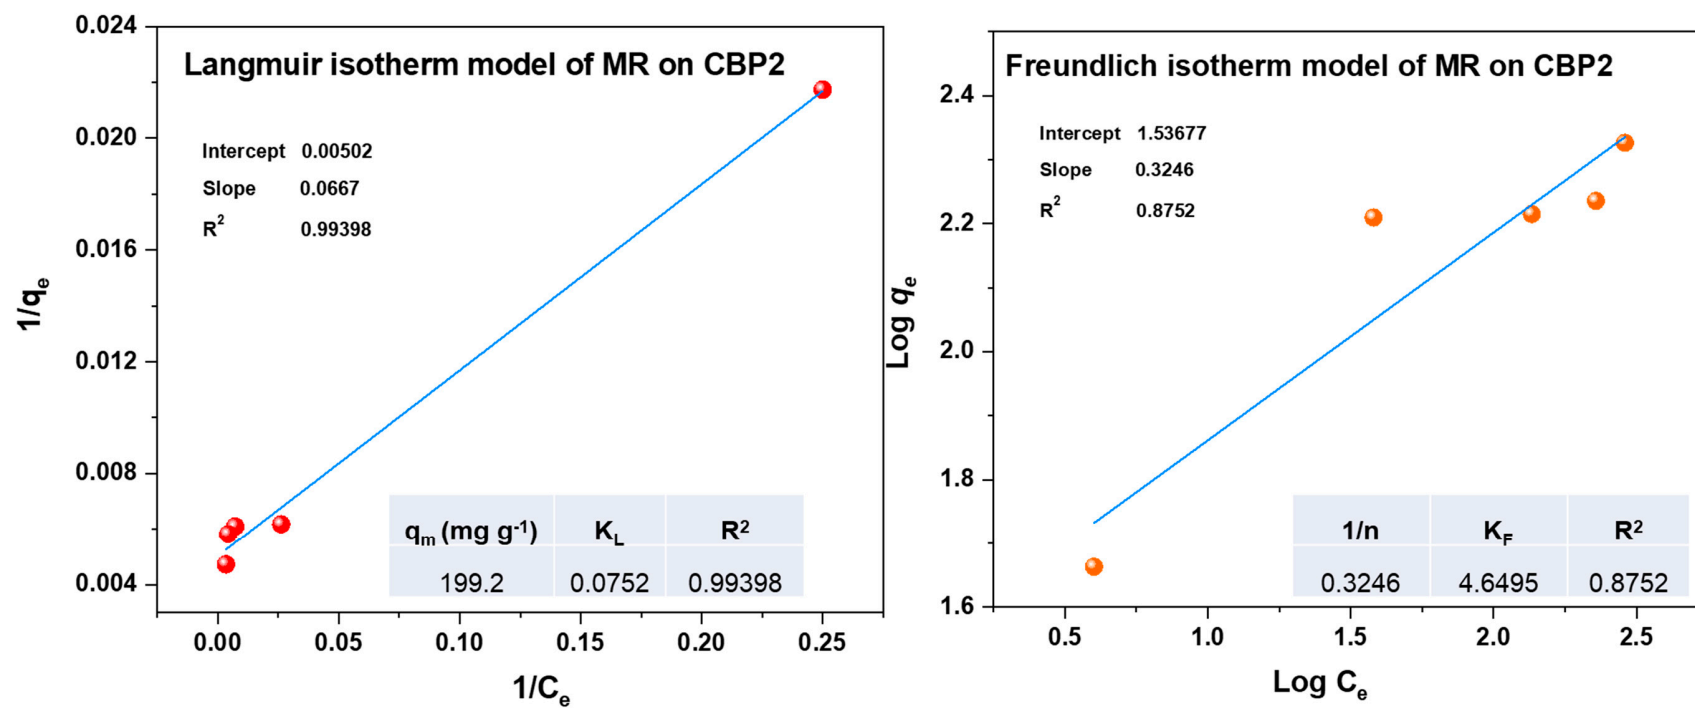

**Figure S32: Linear** Langmuir (left) and Freundlich (right) isotherm models of **MR** on **CBP2**

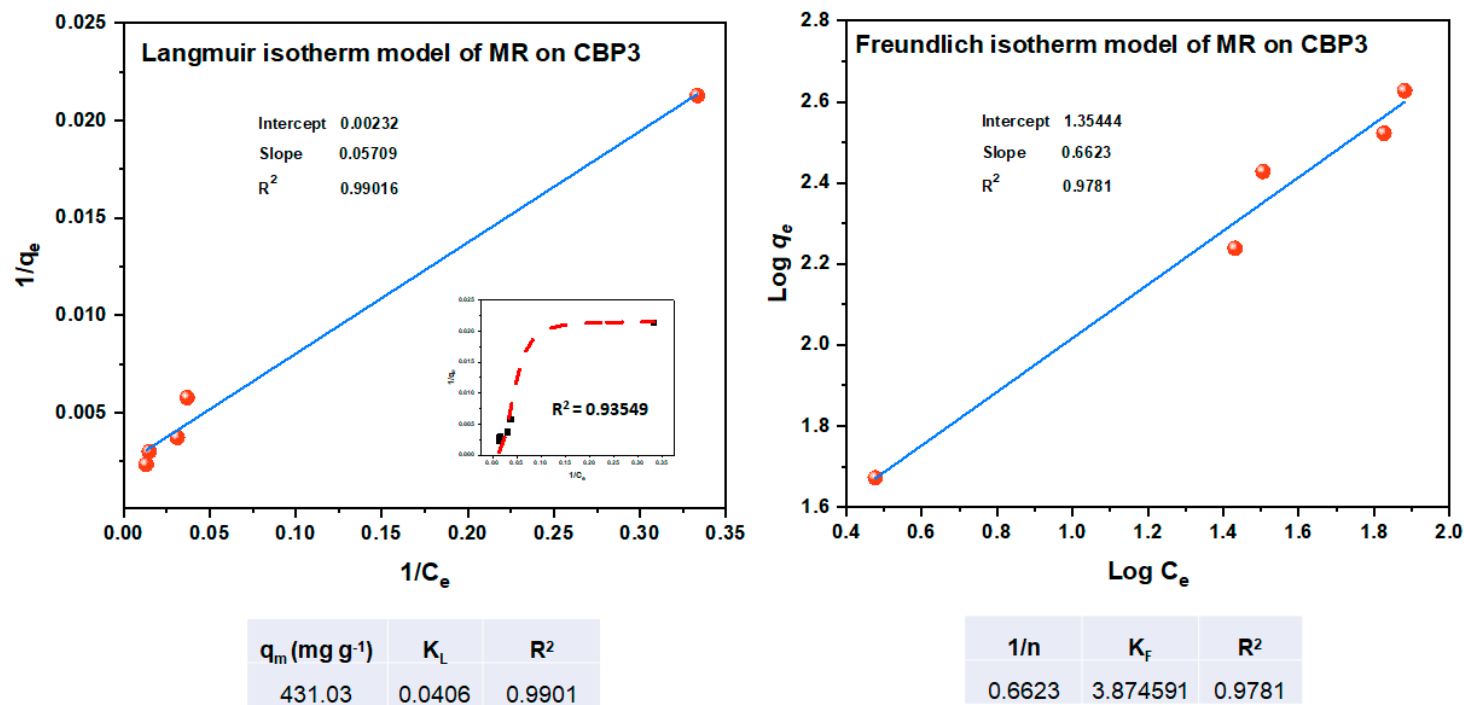

**Figure S33: Linear** Langmuir (left) and Freundlich (right) isotherm models of **MR** on **CBP3** (inset: **non-linear Langmuir isotherm model of MR on CBP3**)

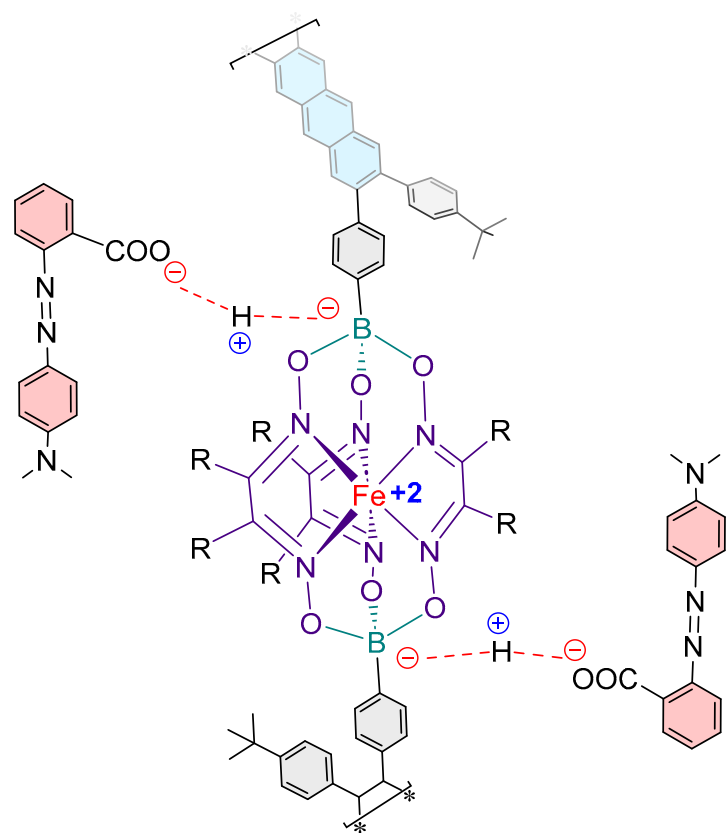

**Figure S34:** Plausible interaction of the copolymers and MR dye
